# Supplementary material for: Chitosan-based Self-Adaptive Crosslinker-Driven Functional Integration of Polyurethane Foam: High Strength, Intrinsic Flame Retardancy, and Upcycling
Source: Research Square preprint supplement (doi:10.21203/rs.3.rs-8431643/v1), 2026-01-05
Supplement: Supplementary file 1 [file 9844b4ddfb12962805c8bd10.docx]

**Supporting Information**

**Chitosan-based Self-Adaptive Crosslinker-Driven Functional Integration of Polyurethane Foam: High Strength, Intrinsic Flame Retardancy, and Upcycling**

*Tianchen Zhang1, Zheng Pan1, Linfeng Tian1, Baozheng Zhao1,* *Fei Song1*, Yonghong Zhou1,3, Meng Zhang.1,2**

*1Institute of Chemical Industry of Forest Products, Chinese Academy of Forestry, Nanjing 210042, PR China,**National Key Laboratory for Development and Utilization of Forest Food Resources,*

*2Key Lab. of Chemical Engineering of Forest Products, National Forestry and Grassland Administration,*

*3National Engineering Research Center of Low-Carbon Processing and Utilization of Forest Biomass, Jiangsu Province, Nanjing 210042, P. R. China.*

**Correspondence author: Meng Zhang (zhangmeng@icifp.cn)*

*Fei Song (1099874404@qq.com)*

**Experimental Section**

***Materials:*** Castor oil (CO), rosin acid, Chitosan (Viscosity 100-200 mPa·s), and 1,8-diazabicycloundec-7-ene (DBU) were purchased from Anaiji Chemical Co., Ltd. Castor oil glycidyl ether (COGE, AR) was provided by Guangzhou Ruishi Biological Company. Surfactant (AK-158), N,N-Dimethylcyclohexylamine, DOPO-HQ (99%), and graphene were purchased from the Alibaba e-commerce platform.

***Synthesis of castor oil-based polyols (COGER):*** COGE (100 g), rosin acid (66.54 g), and DBU (1.0 g) were added to a 250 mL conical flask and heated to 130 °C. The reaction was carried out at this temperature for 8 h. Finally, a brownish-red oily liquid (COGER) was obtained.[1]

***Synthesis of chitosan crosslinking agent(CS/DOPO-HQ):*** Chitosan (10 g) was dissolved in a 7% aqueous acetic acid solution, followed by the addition of paraformaldehyde (3.72 g) and DOPO-HQ (20 g). The mixture was stirred for 30 minutes, then slowly heated to 110°C and reacted for 6 hours. After the reaction was complete, the crude product was filtered and ultrasonically washed several times with aqueous acetic acid and anhydrous ethanol. Finally, it was vacuum dried to obtain a light yellow multifunctional chitosan crosslinking agent (CS/DOPO-HQ).[1-3]

***Preparation of Semi-rigid polyurethane foam:*** The obtained COGER and CO were mixed and stirred at 1500 r/min for 1 min. Then, a certain amount of surfactant AK-158, N, N-Dimethylcyclohexylamine, and foaming agent water was added with continuous stirring for 30 s. Then, add an appropriate amount of PM-200, stir for 8 s, and leave it to cure at room temperature for 1 h. The final polyurethane foam SPUR is obtained. Using the same method, polyurethane semi-rigid foams with different properties were prepared by changing the ratio of polyols (CO, COGER, CS/DOPO-HQ) in the system. Specific formulations are detailed in Supporting Information Table S1.[4, 5]

**Characterization**

**Structural characterization.** The samples were characterized by Fourier transform infrared reflectance spectroscopy (FT-IR) using an infrared spectrometer (Nicolet IS10, Thermo Scientific, USA) with a scan range of 4000 to 400 cm-1. 1H nuclear magnetic resonance (NMR) spectroscopy of the samples was performed on an ARX 300 NMR (Bruker, Germany) spectrometer using CDCl3 as solvent. The surface morphology of the samples was observed by cold field emission electron microscopy (SU8010, Hitachi High-Technologies Corporation, Japan).[1,2] The surface morphology and elemental composition of the samples were observed using cold field emission electron microscopy (SU8010, Hitachi High Technology Co., Ltd., Japan) and energy-dispersive X-ray spectroscopy (EDS). XPS spectra were recorded on an Axis Ultra DLD (Kratos, UK) spectrometer to analyze the Binding energies and valence states of chemical elements of the sample.

**Thermogravimetric analysis-differential scanning calorimetry test.** Cross-linking behavior was performed on a NETZSCH simultaneous TGA-DSC (449C) at a heating rate of 10 °C/min in N2.[3,4] However, Thermogravimetric analysis (TG, 209 F1, NETZSCH, Germany) of the samples was tested at temperatures from 50 to 800 °C at a heating rate of 10 °C/min.[6]

**Mechanical tests.** Compression and cyclic compression tests were performed on an electronic universal testing machine (Instron 3365, Anglo-Saxon, UK) at 25 °C and 5.0-50 mm/min by ISO 527-4.The tensile strength of the samples was also tested on a universal testing machine, and the specific method is as per GB/T 1040.1-2025. Foam density was measured following ASTM D1622. The sample size was 50 × 50 × 50 mm3, and the final result was the average of three tests. Shore A hardness was measured using a Shore hardness tester (HTS-200A, Shanghai, China) with a sample size of 100 × 100 × 50 mm3.

**Dynamic mechanical analysis.** Dynamic mechanical testing was performed using a DMA Q 800 analyzer (TA Instruments, USA). Specimens with dimensions of 35 × 12 × 3 mm3 were analyzed at a heating rate of 5 °C/min in the temperature range -100 to 150 °C, samples were analyzed in single cantilever mode in an air atmosphere with a frequency of 1 Hz.[5]

**Flame retardancy test.** Limited Oxygen Index (LOI) values were recorded using a Limited Oxygen Index Meter (JF-3, China) with sample dimensions of 130 × 6.5 × 3 mm3. A cone calorimeter (CONE, FTT2000, Fire Testing Technology, U.K.) was used to measure the fire behavior of the SPUs by ISO 5660-1. To eliminate sources of error, the samples were each cut to a size of 100 × 100 × 50 mm3 and tested three times. The gaseous products of the samples' combustion were detected using a thermogravimetric analyzer (TG209F1, Netzsch, Germany) and an FT-IR spectrometer (Nicolet IS50, Nicolet, U.S.A.), and all samples were heated to 800 °C in an air atmosphere at a rate of 10 °C/min with a flow rate of 40 mL/min.

***Electromagnetic shielding testing:*** Conductivity was measured using a four-point probe instrument (RTS-8, China), with measurements repeated for five samples and the results averaged. EMI shielding performance was evaluated using a vector network analyzer (PNA-N5247A, Agilent Technologies, USA). EMI testing was performed using a coaxial method in the X-band (8.2–12.8 GHz), using samples cut into 13 mm diameter disks; five samples of each type were measured five times. Scattering parameters (S11 and S21) were recorded to calculate the power coefficients of reflectivity (R), transmissivity (T), and absorptivity (A), and their relationship can be described as:

*R= S-1*

*S-2*

*A=1-R-T* *S-3*

Then SE*total*, SE*R*, and SE*A* can be calculated as follows:

*S-4*

*S-5*

*SEtotal= SER+ SEA +SEM S-6*

where SEM is the microwave multiple internal reflections, which can be negligible when SEtotal≥10 dB[7, 8]

**
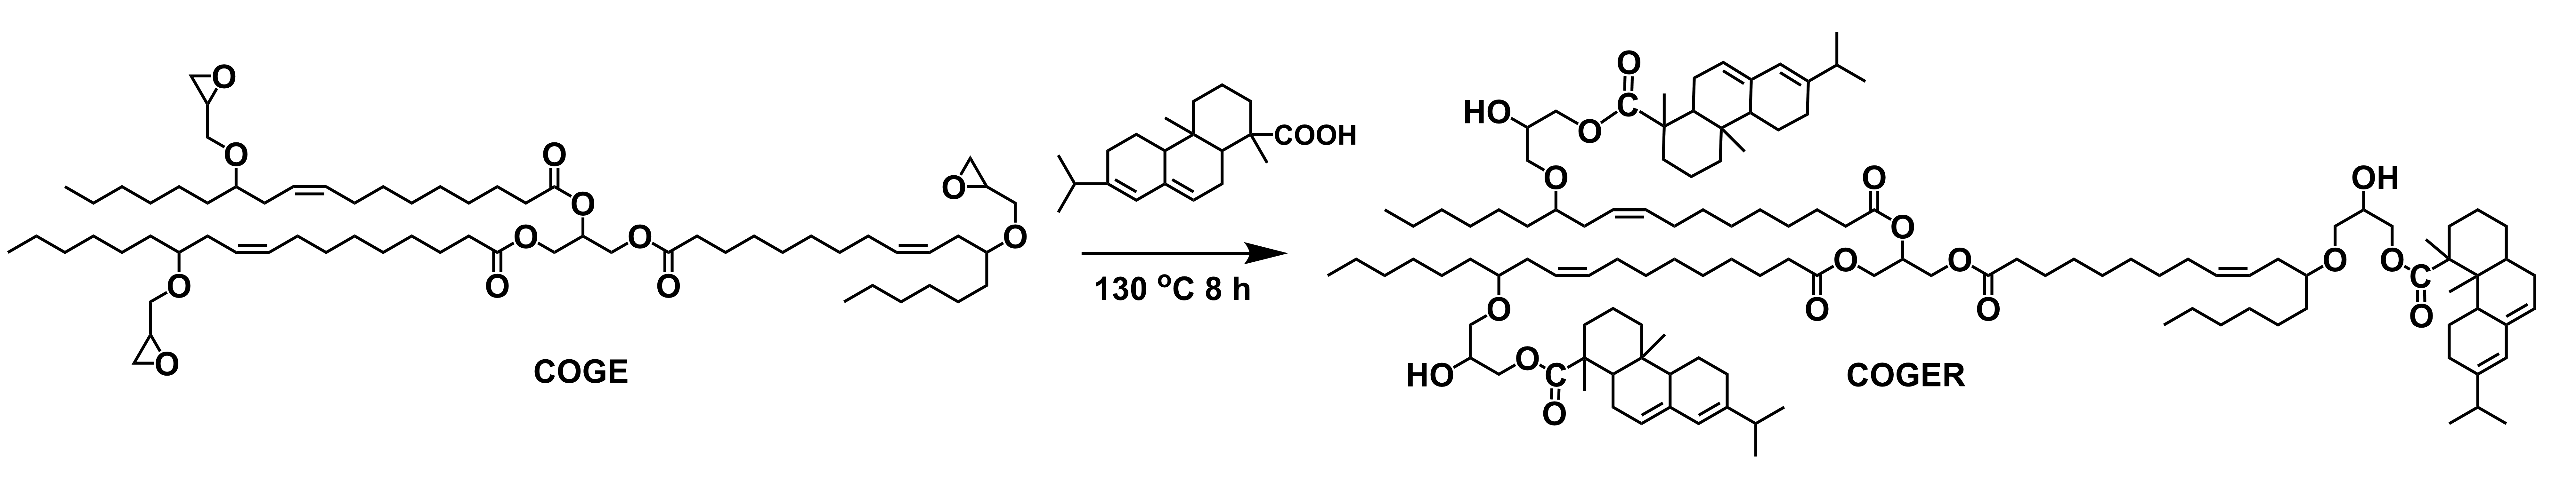
****Scheme S1.** Synthesis route of COGER.


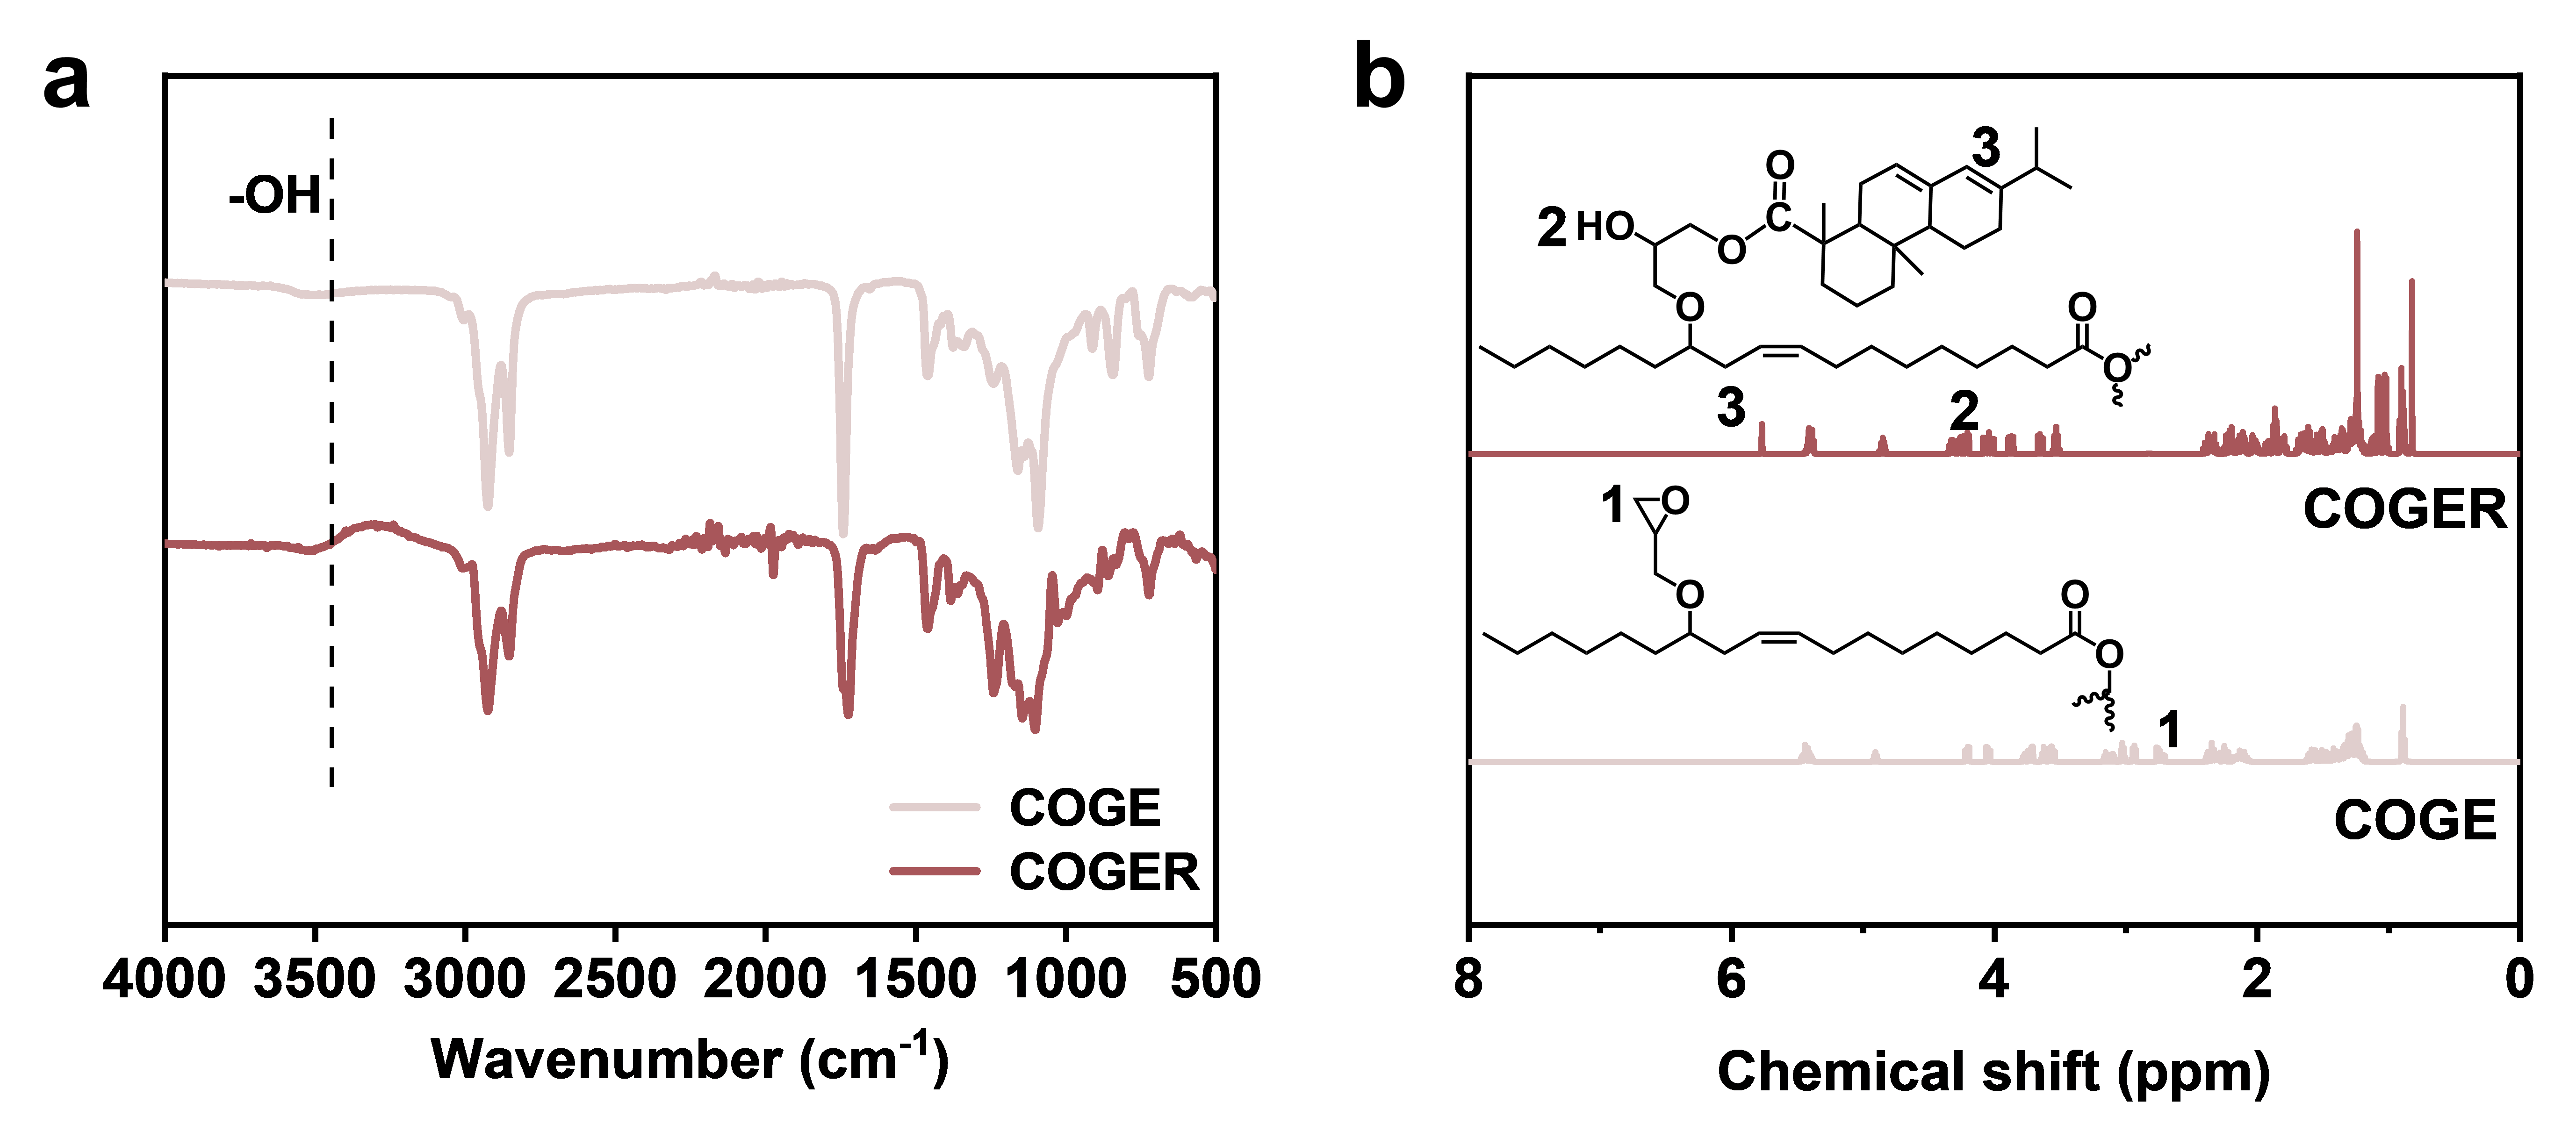


**Figure S1.** Characterization of Polyols. (a) FT-IR spectra of polyols, (b) 1H-NMR spectra of polyols.


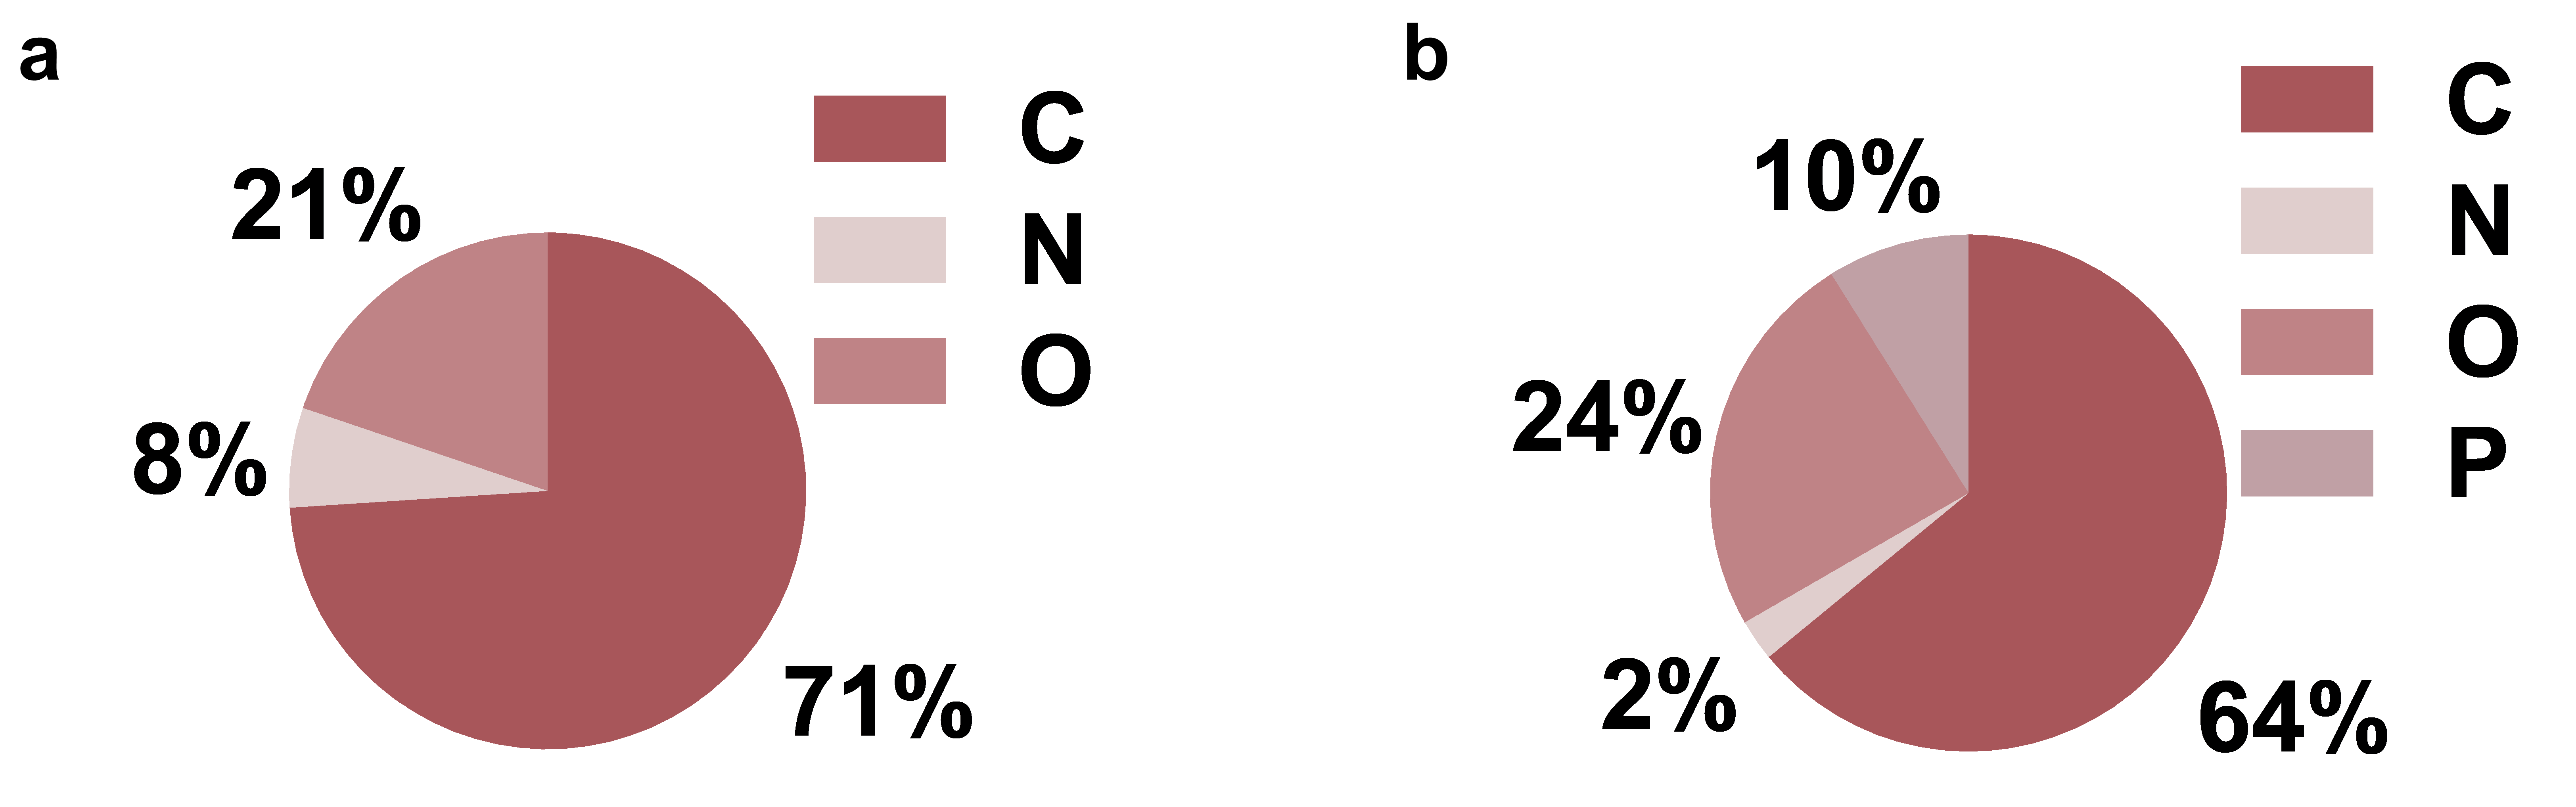


**Figure S2.** EDS testing. (a) CS, (b) CS/DOPO-HQ.


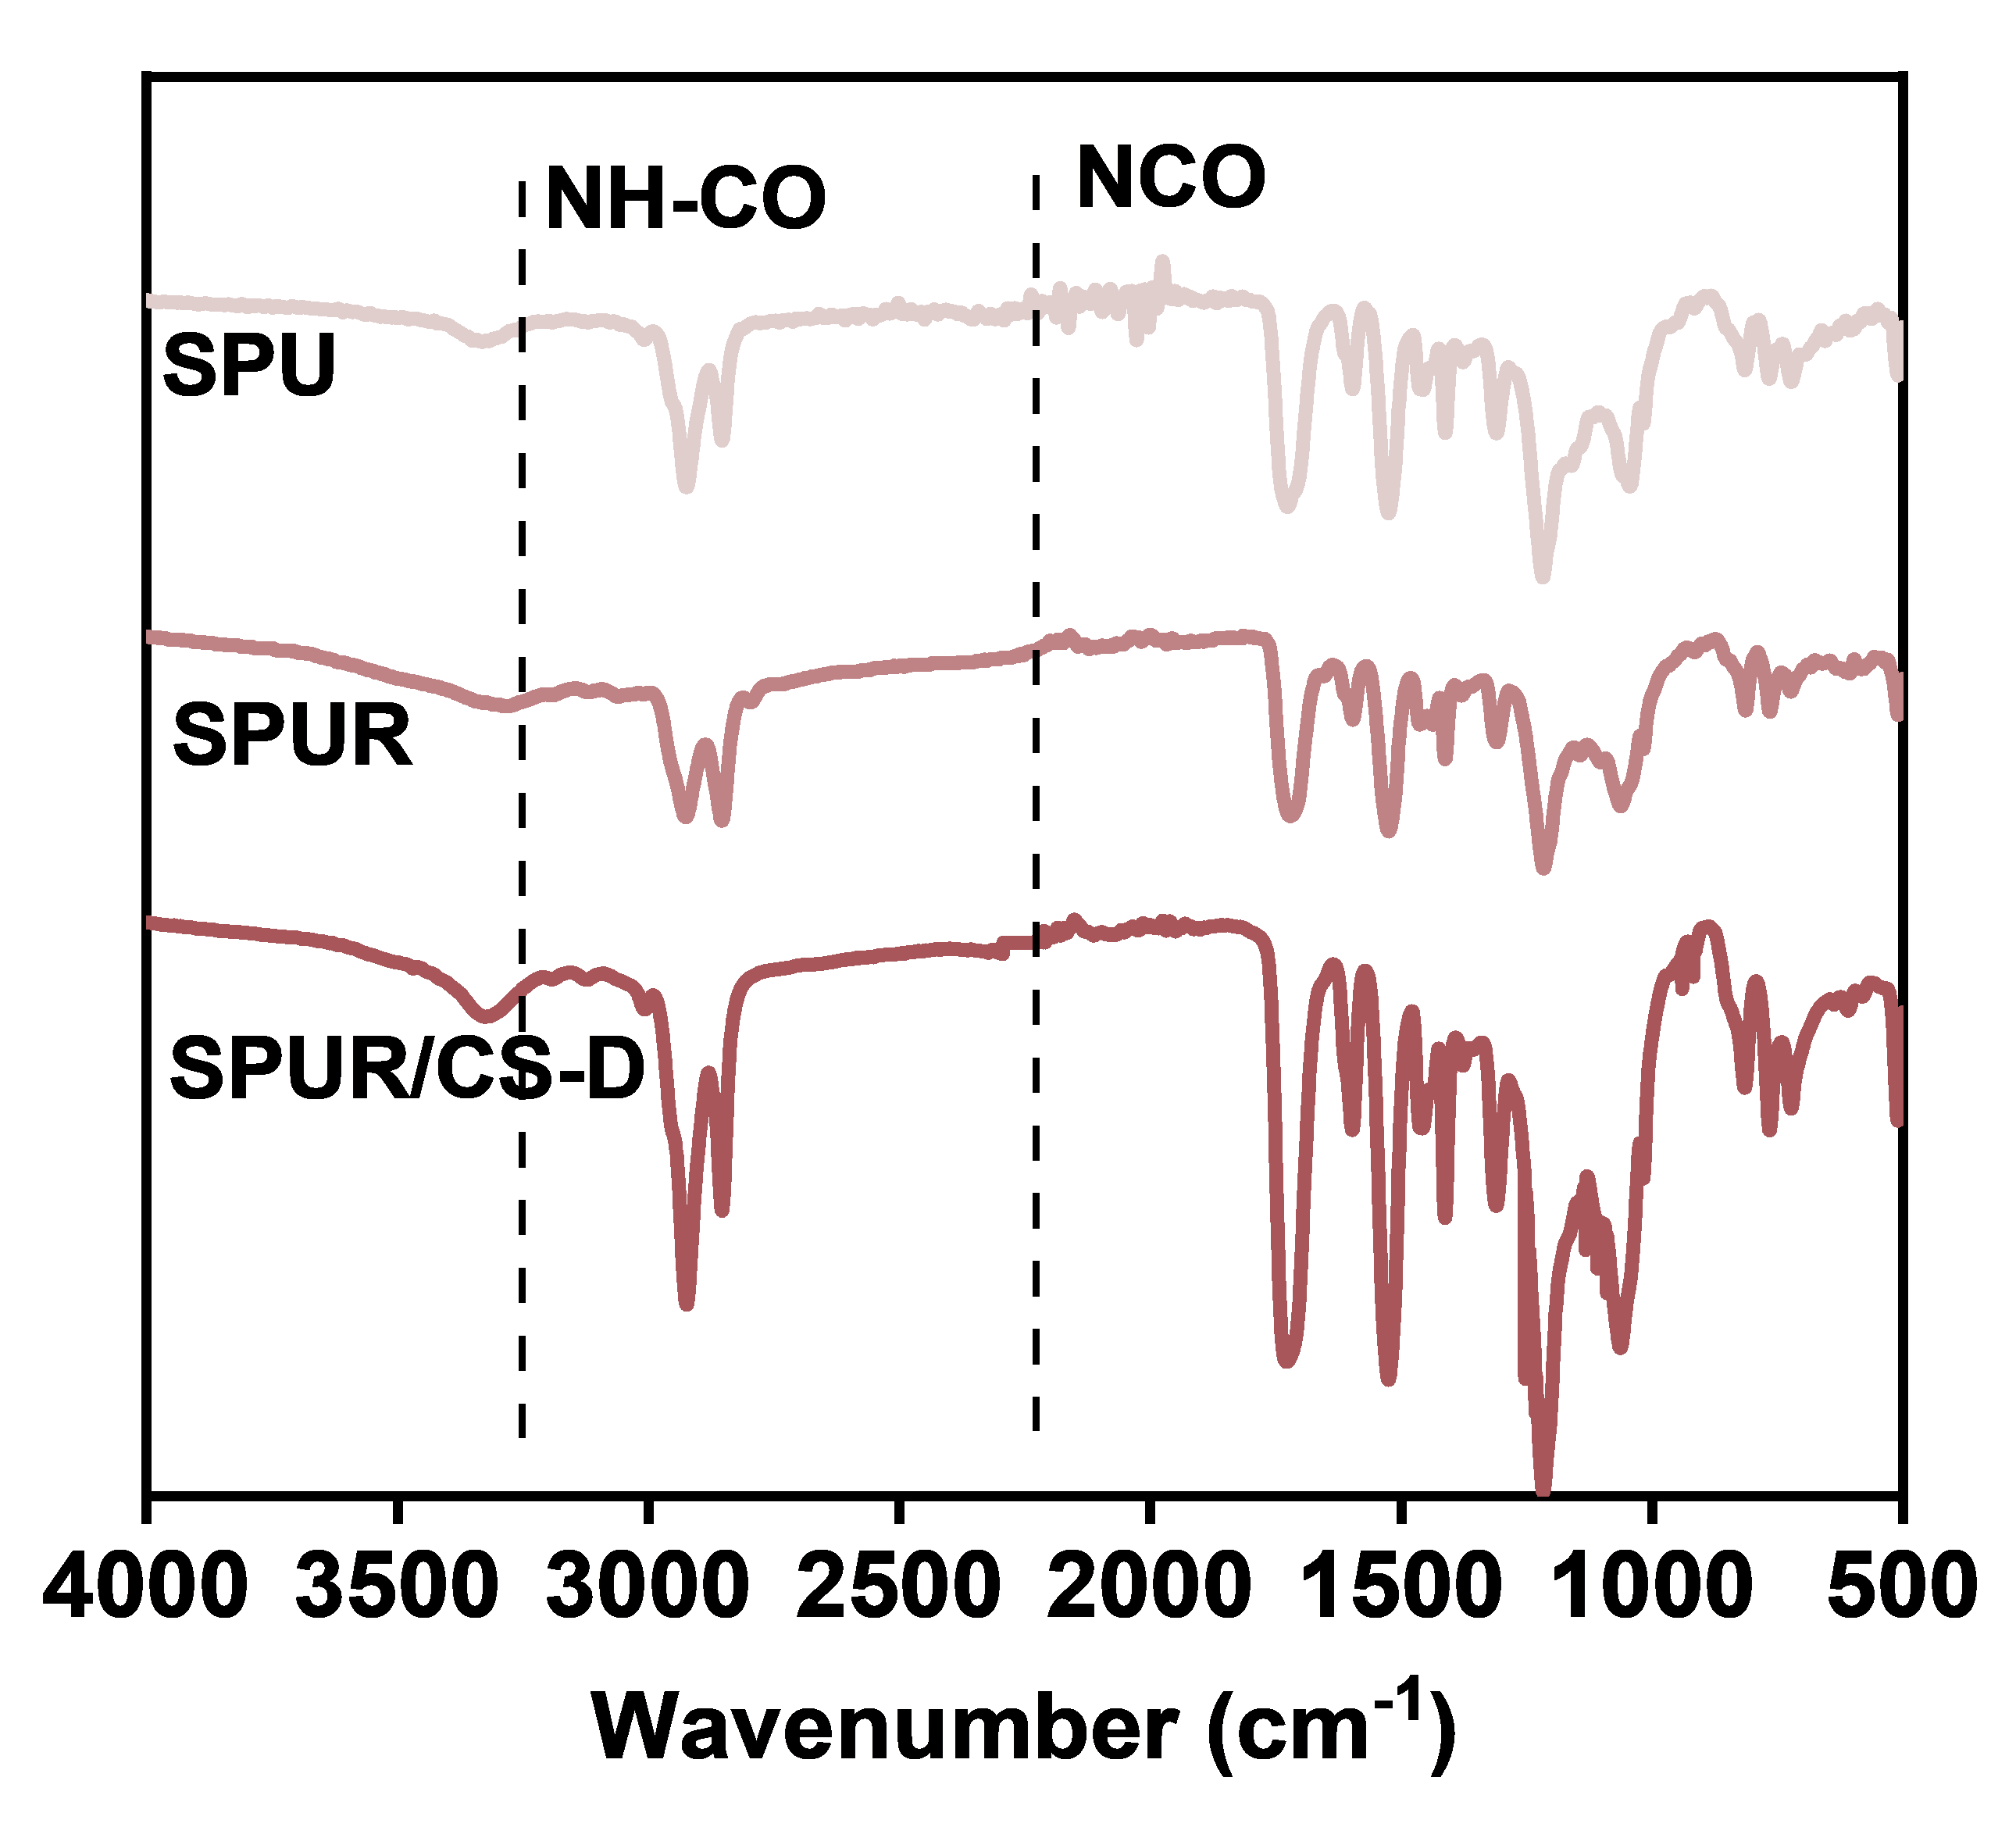


**Figure S3.** FT-IR spectra of foams.


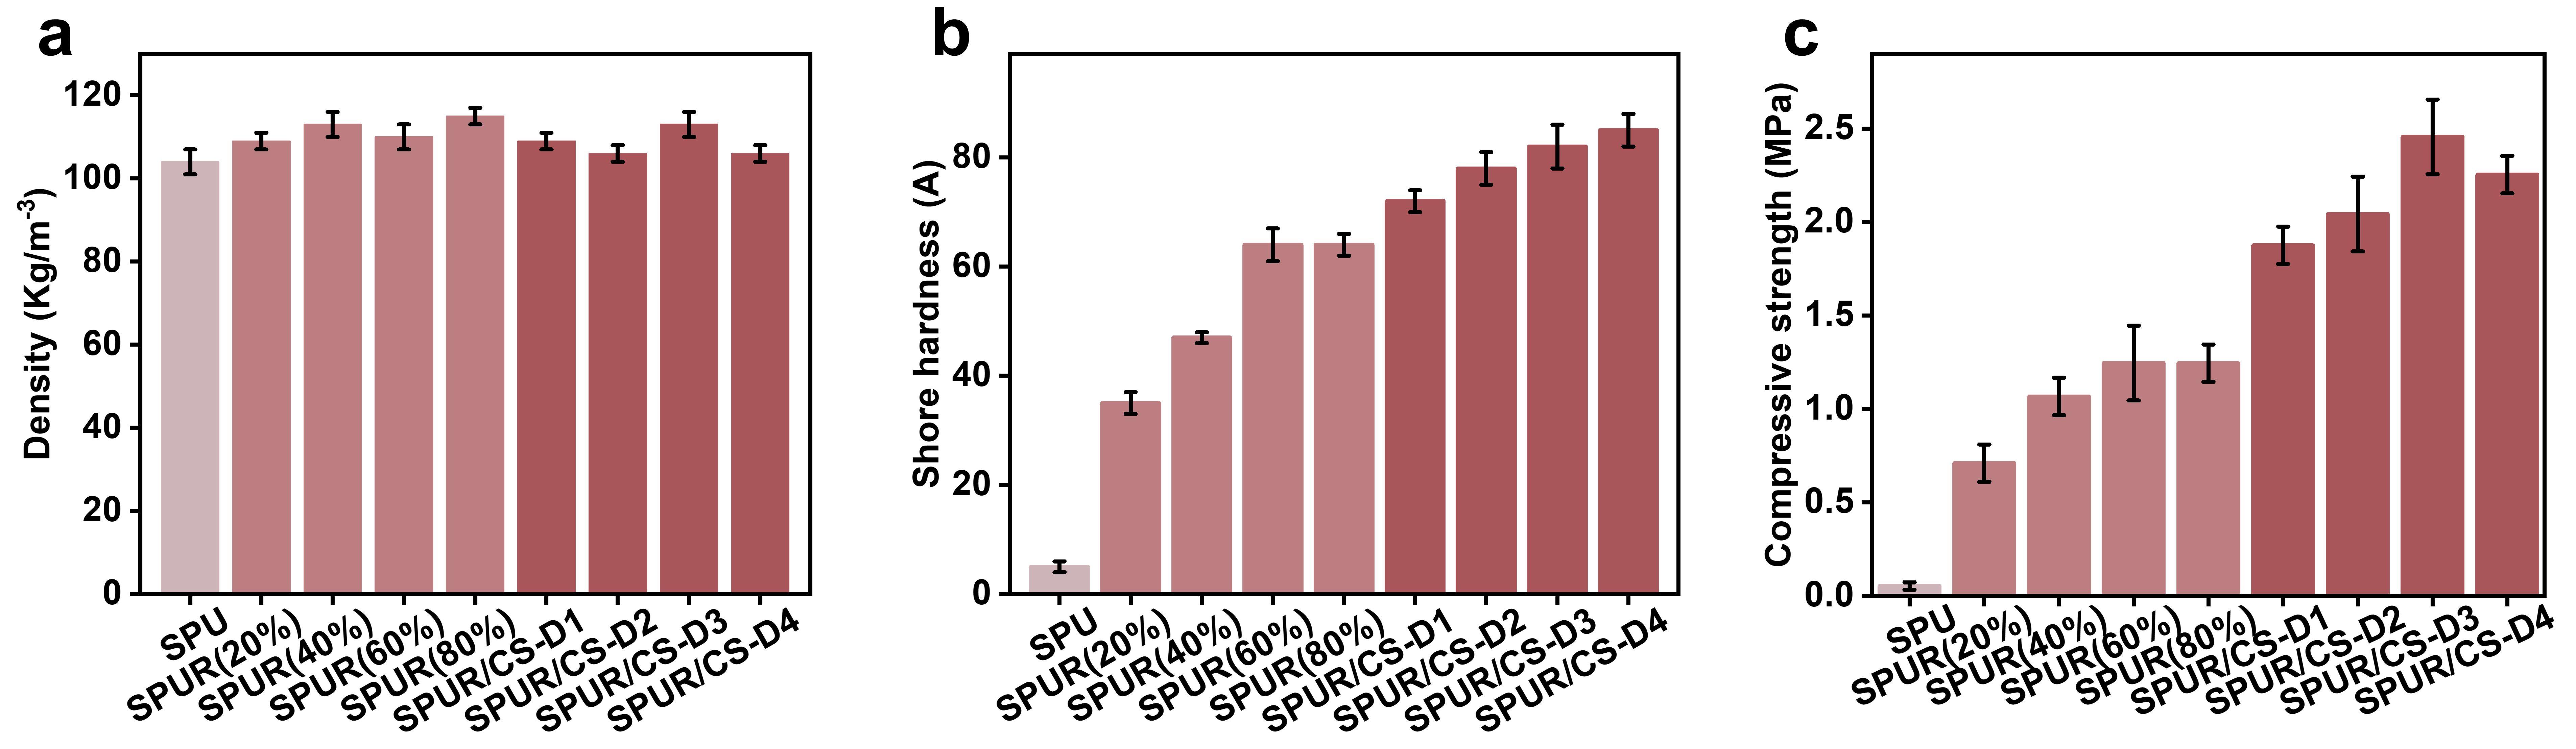


**Figure S4.** (a)Density, (b) Shore hardness, and (c) compressive strength of SPU material.


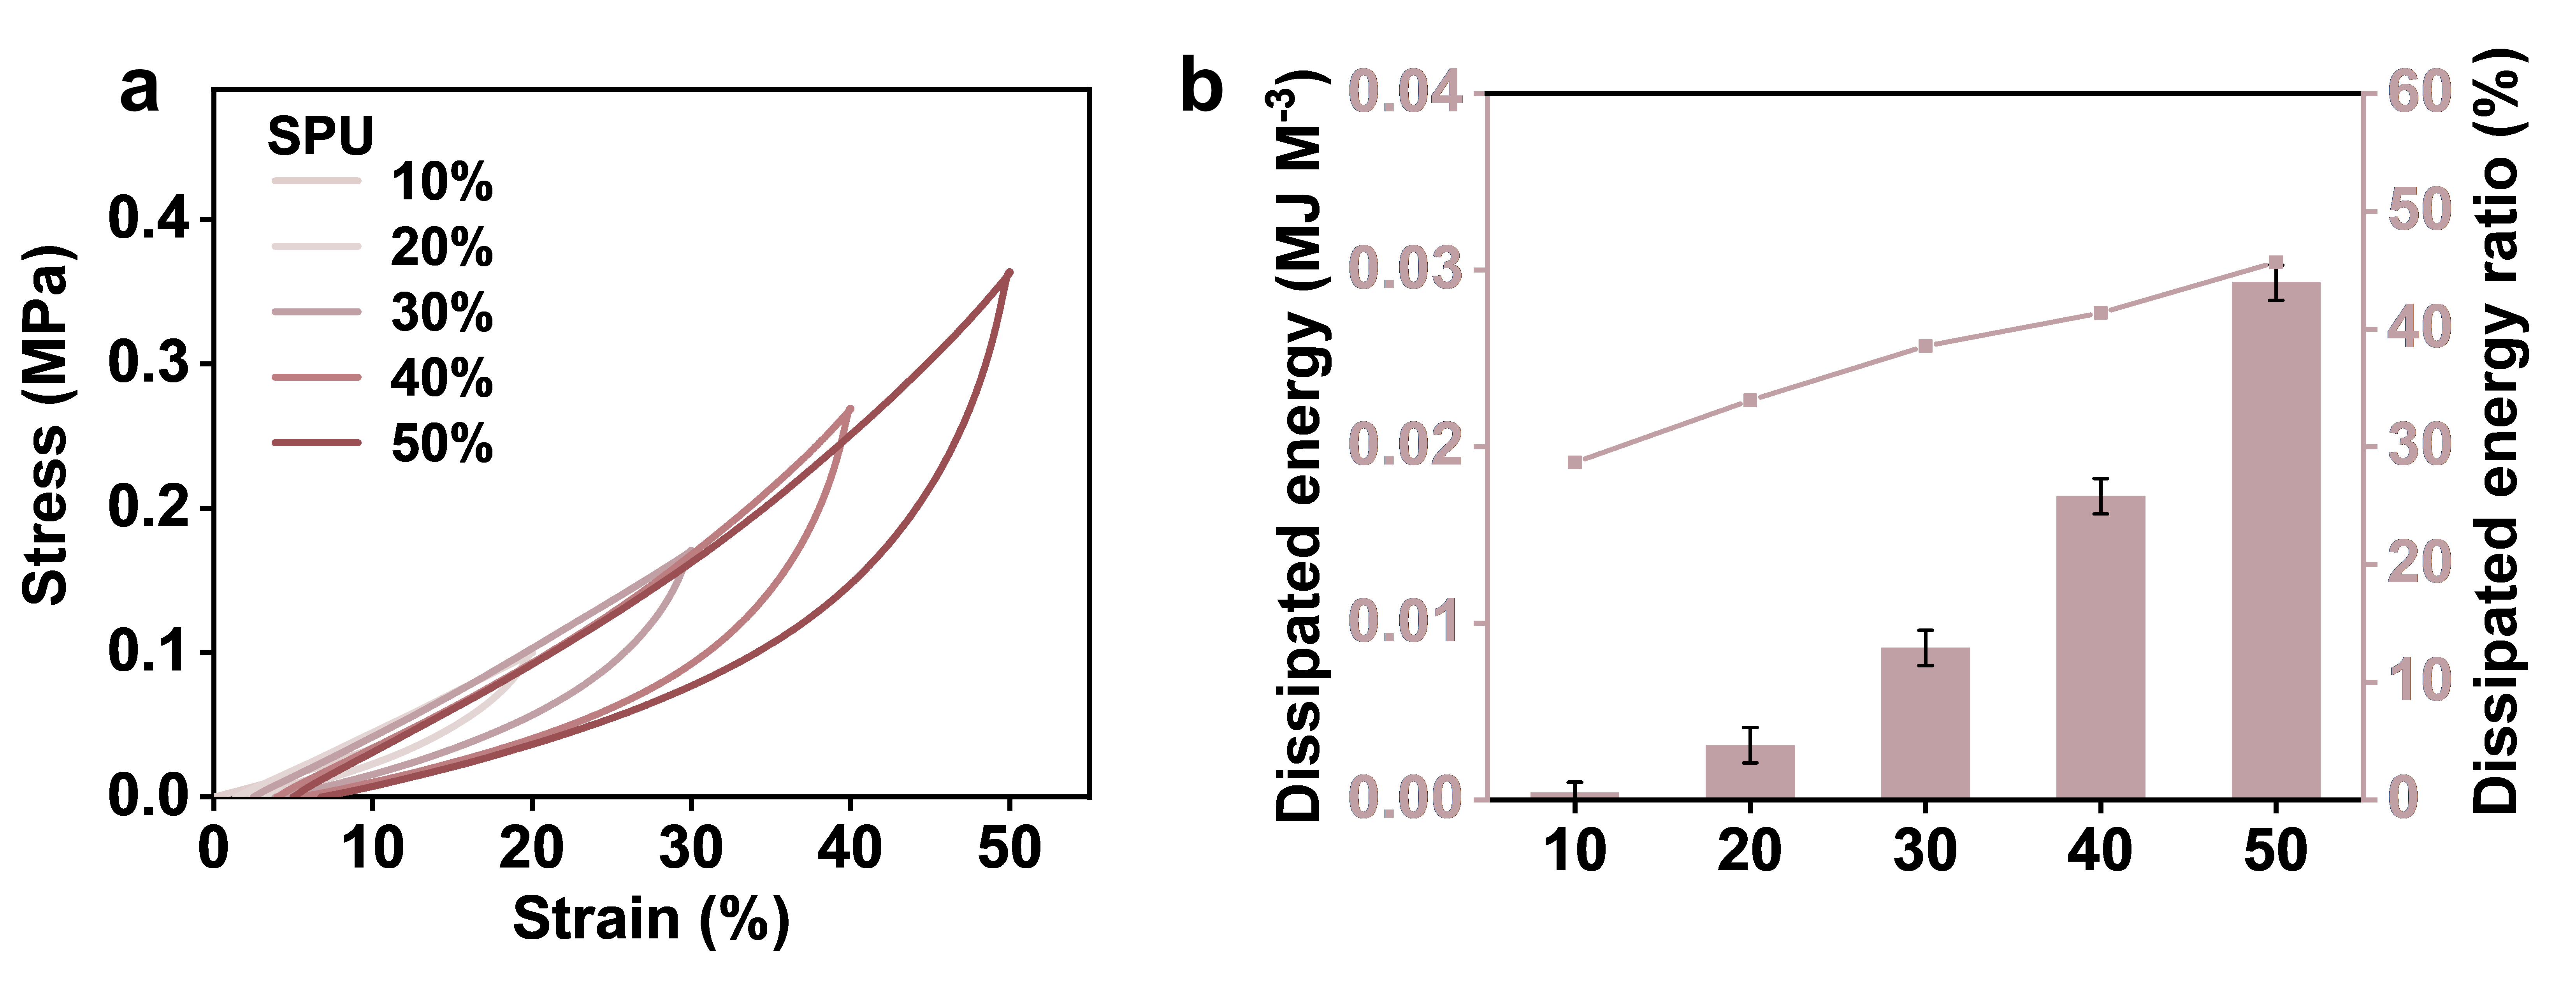


**Figure S5.** (a) Cyclic loading-unloading curves of SPU under different strains, (b) Energy dissipation of SPU.


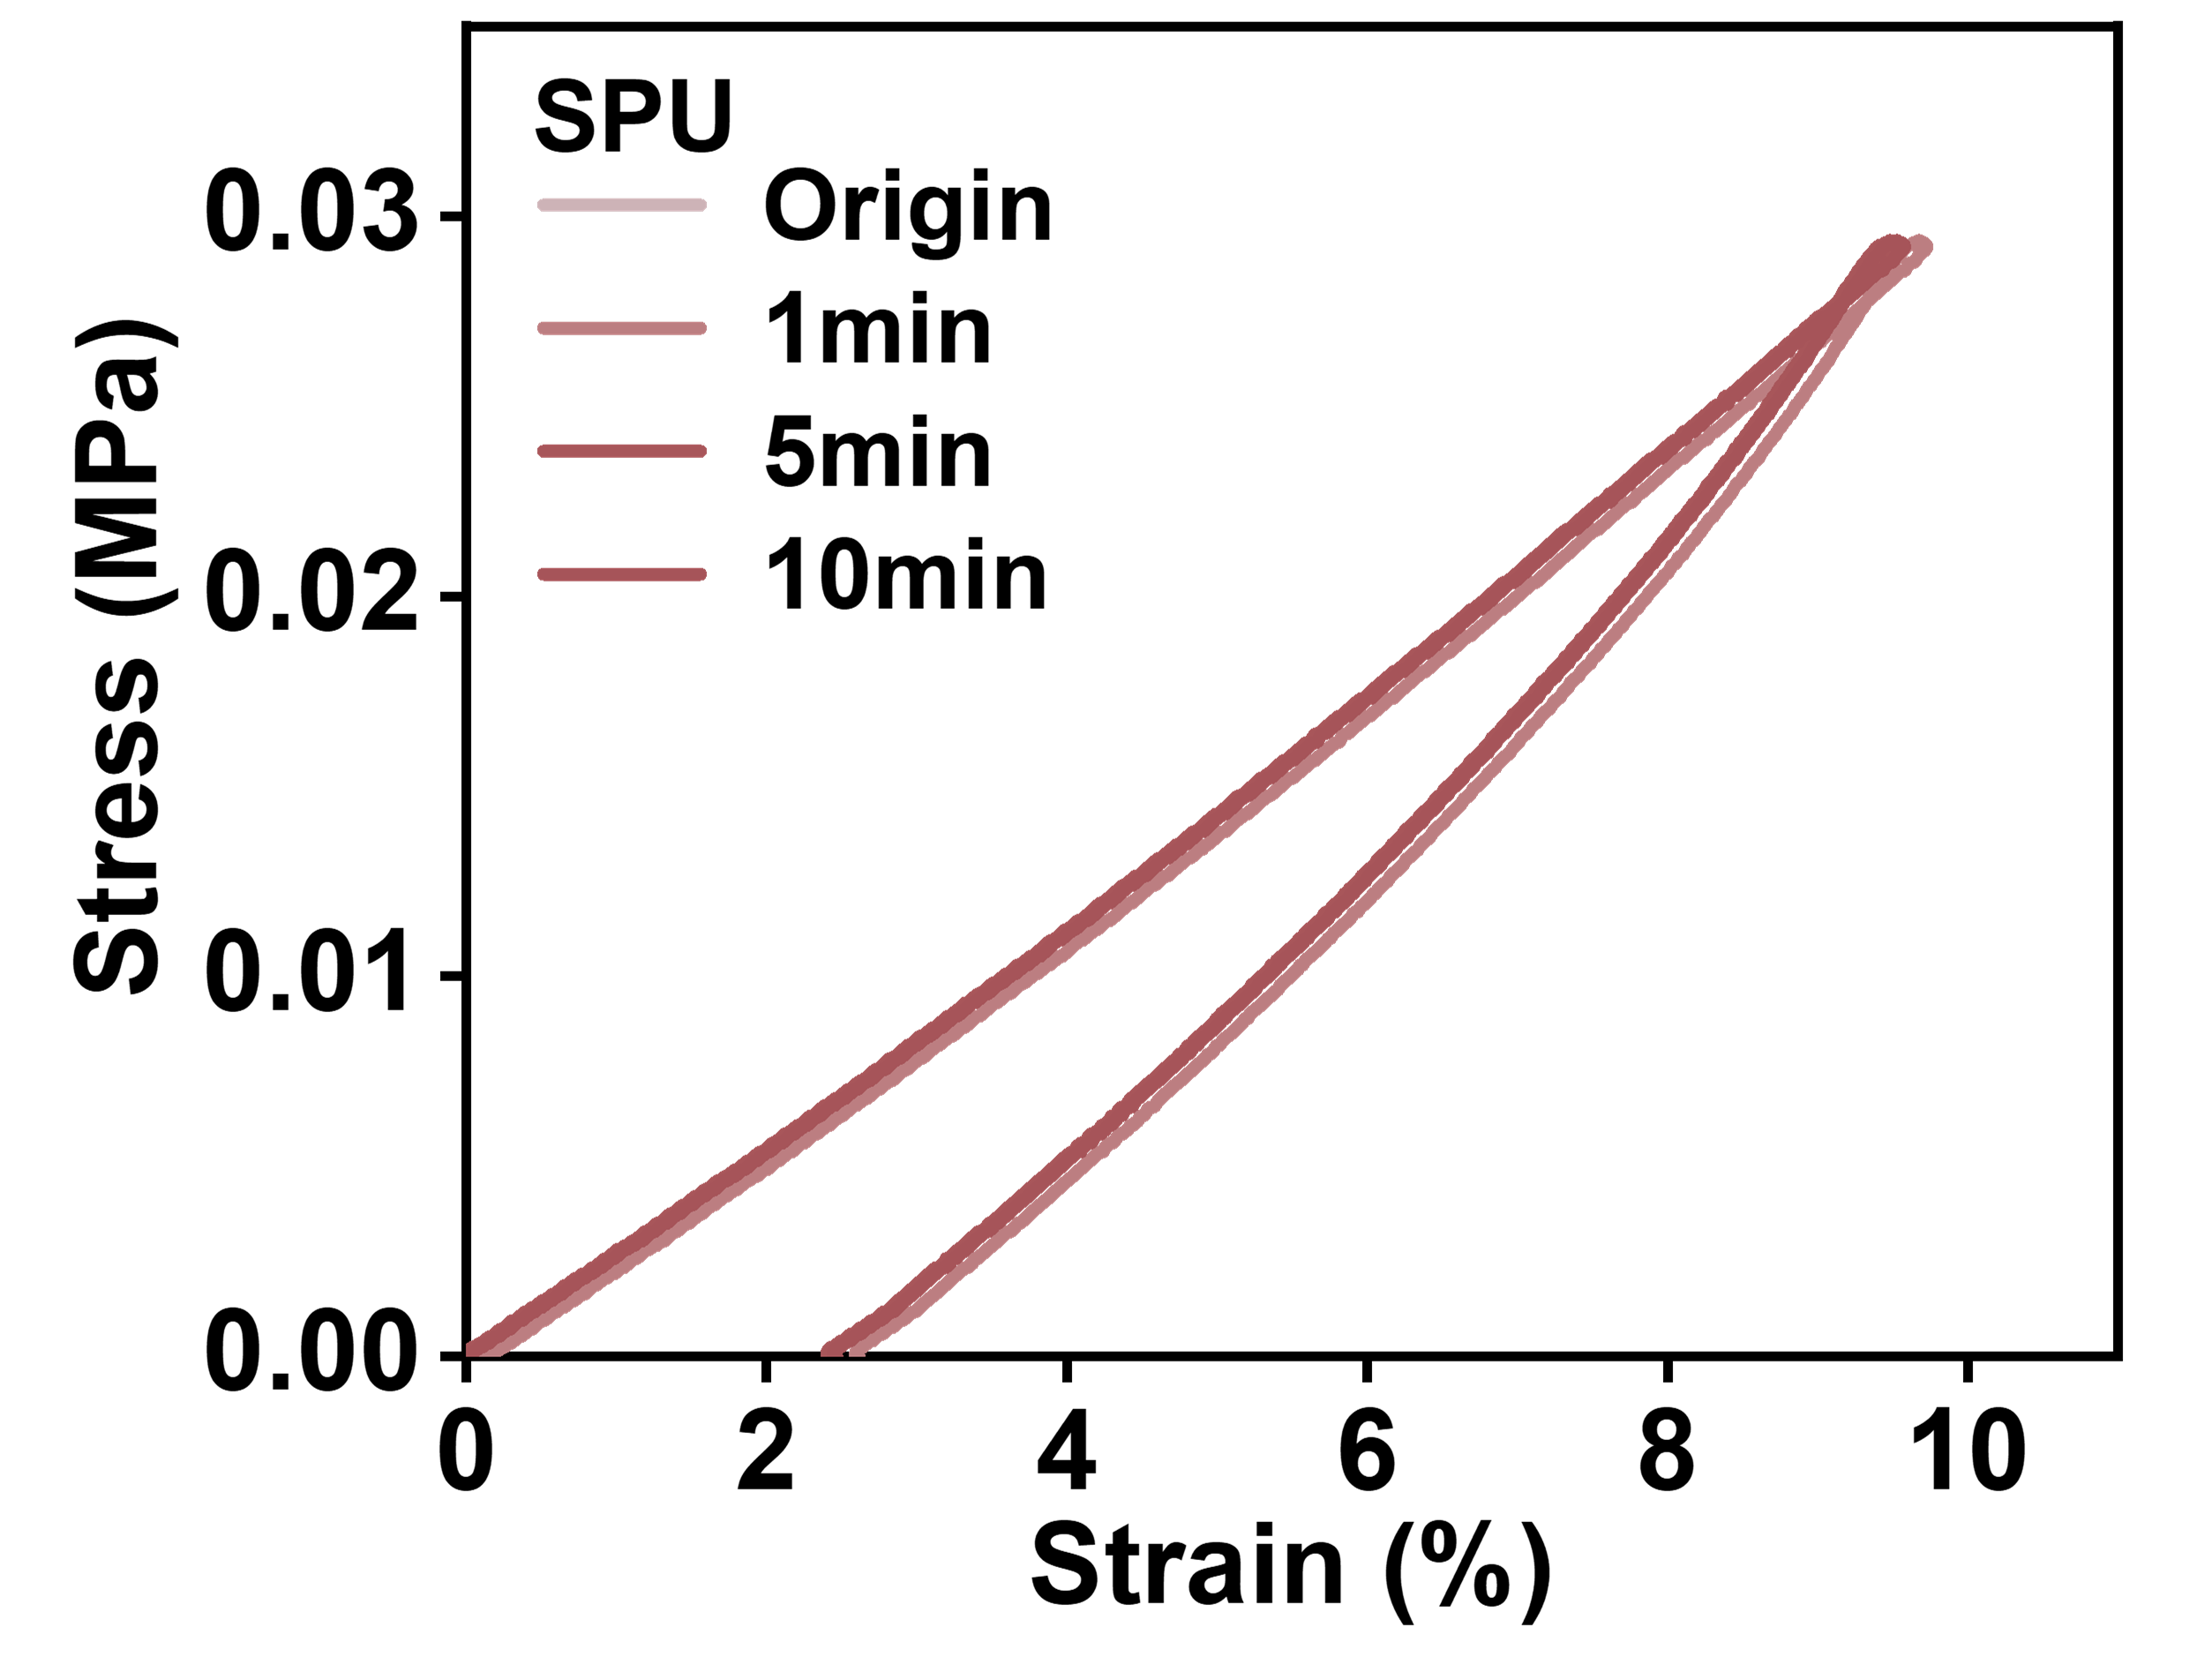


**Figure S6.** (a) Cyclic loading-unloading curve of the same strain SPU.

**Figure S7.** Vertical burning test of foam. (a) SPU, (b) SPUR, (c) SPUR/CS-D.


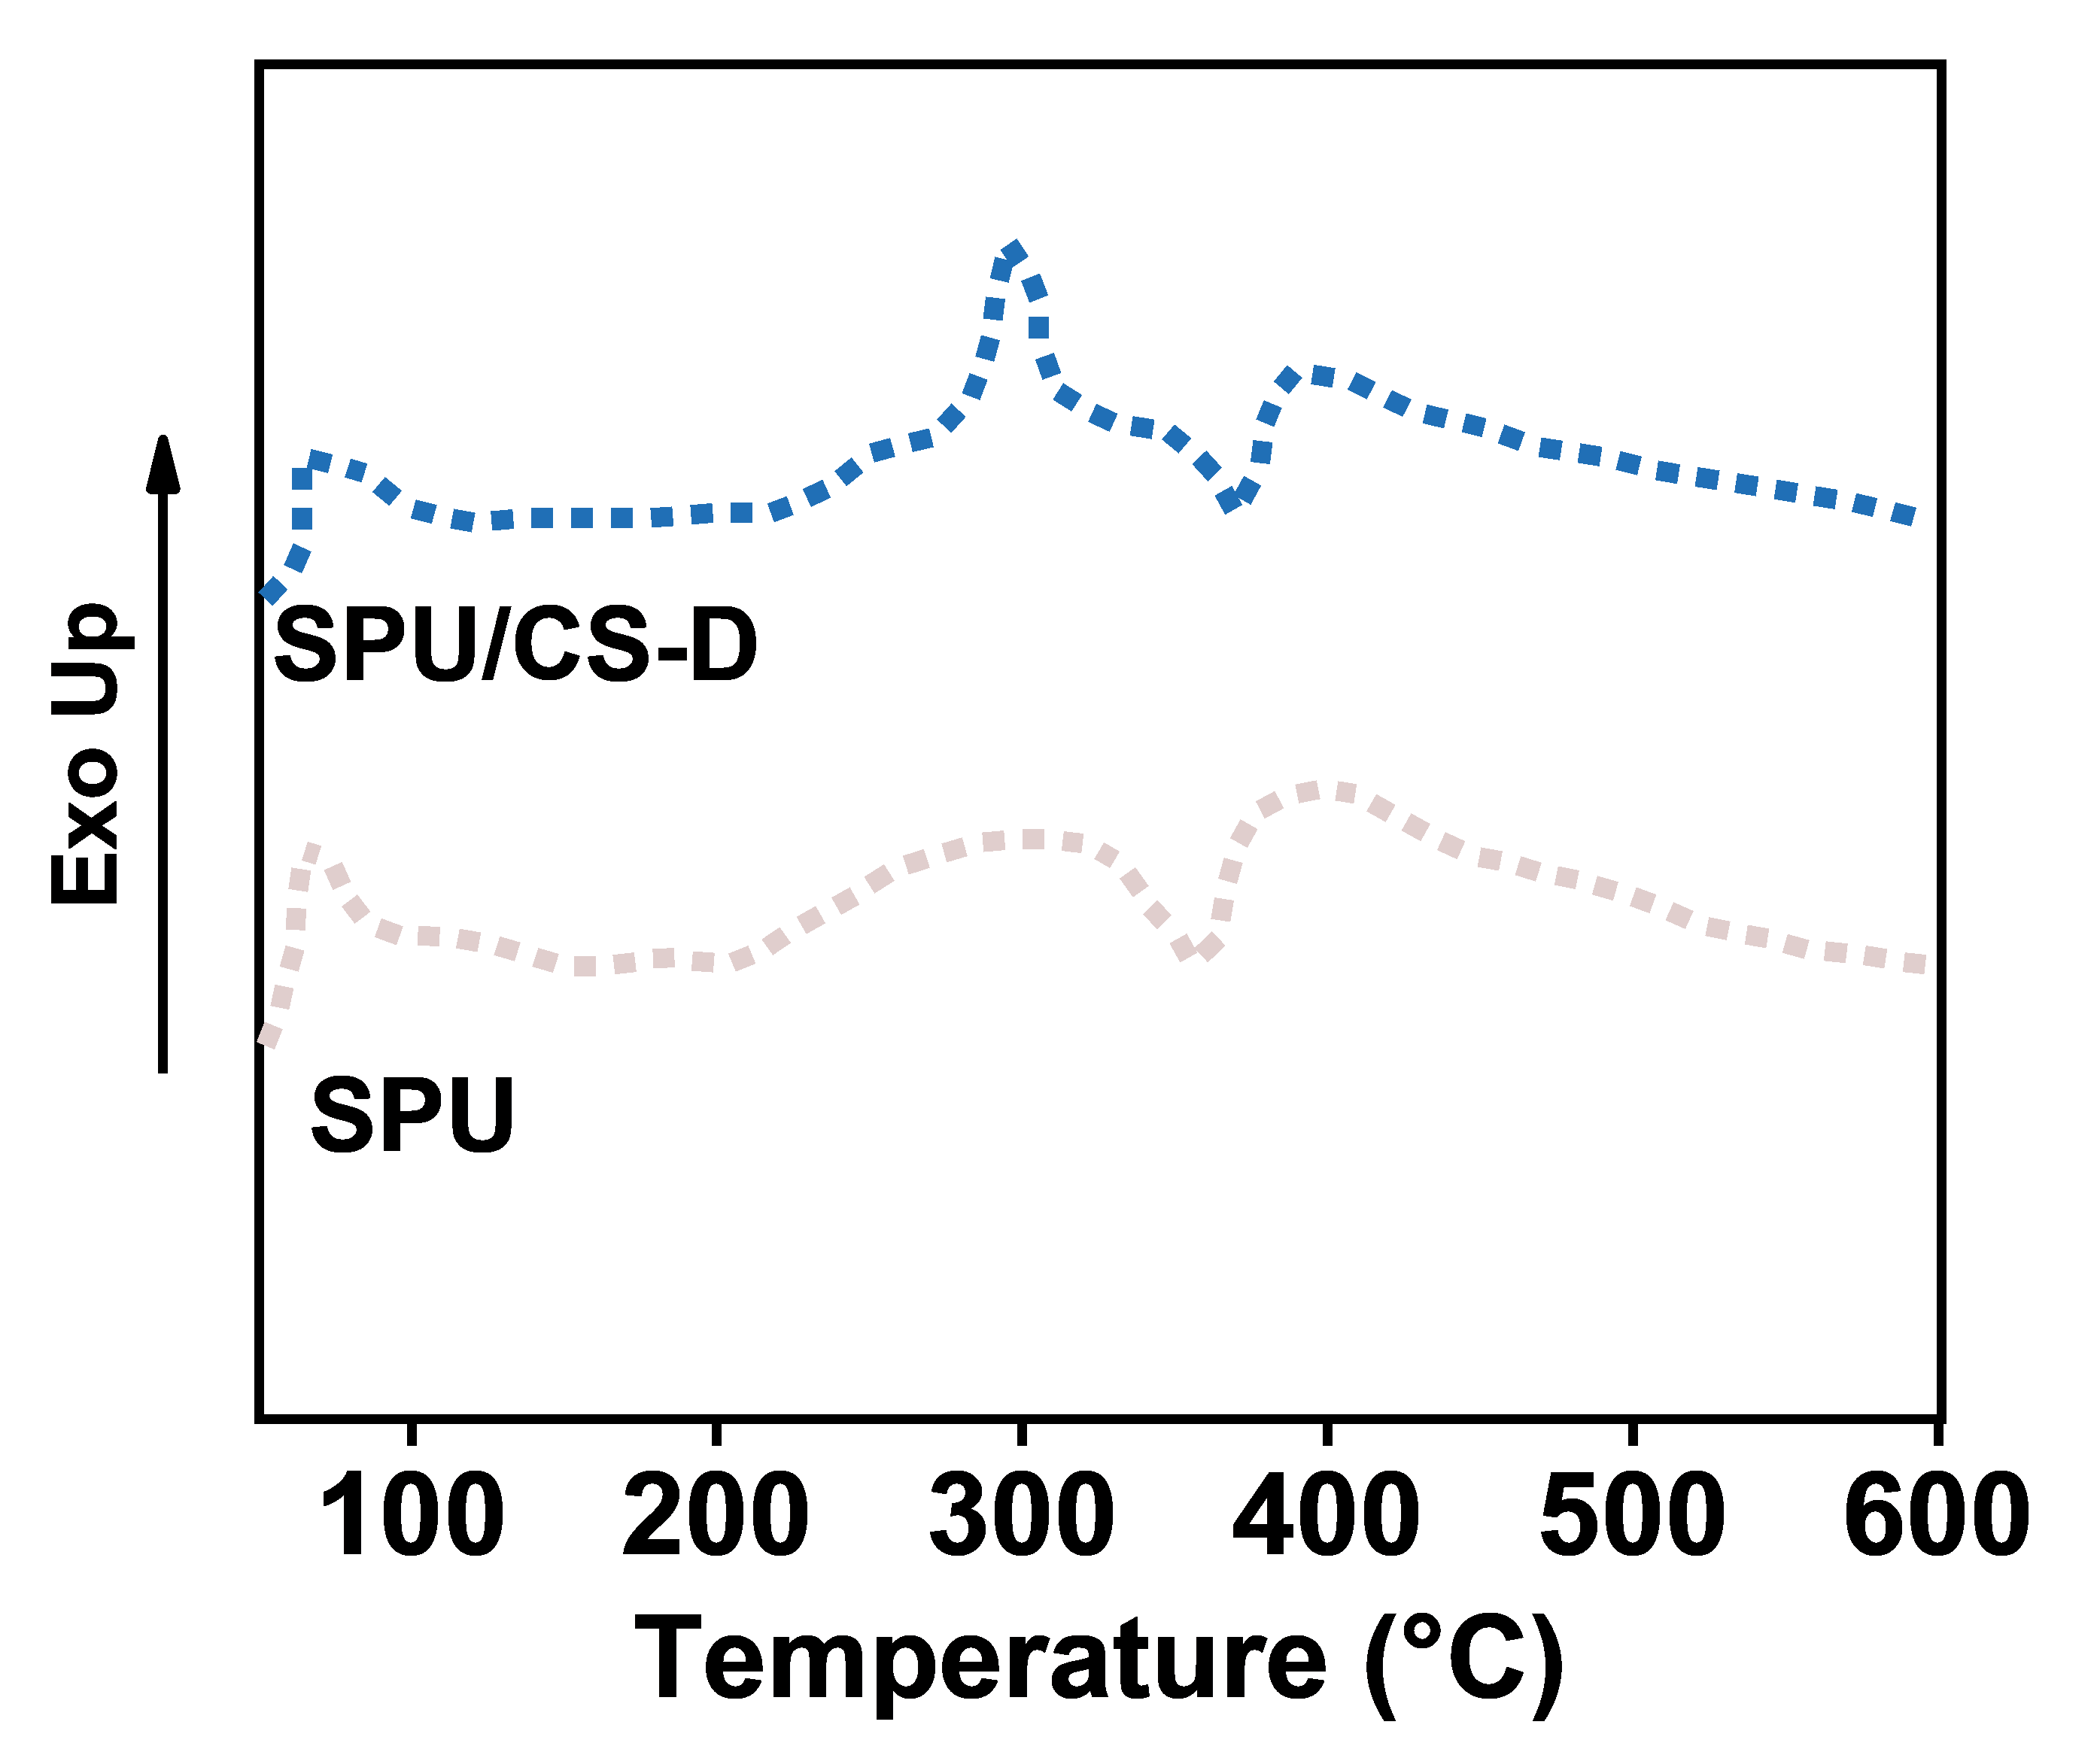


**Figure S8.** DSC curve.


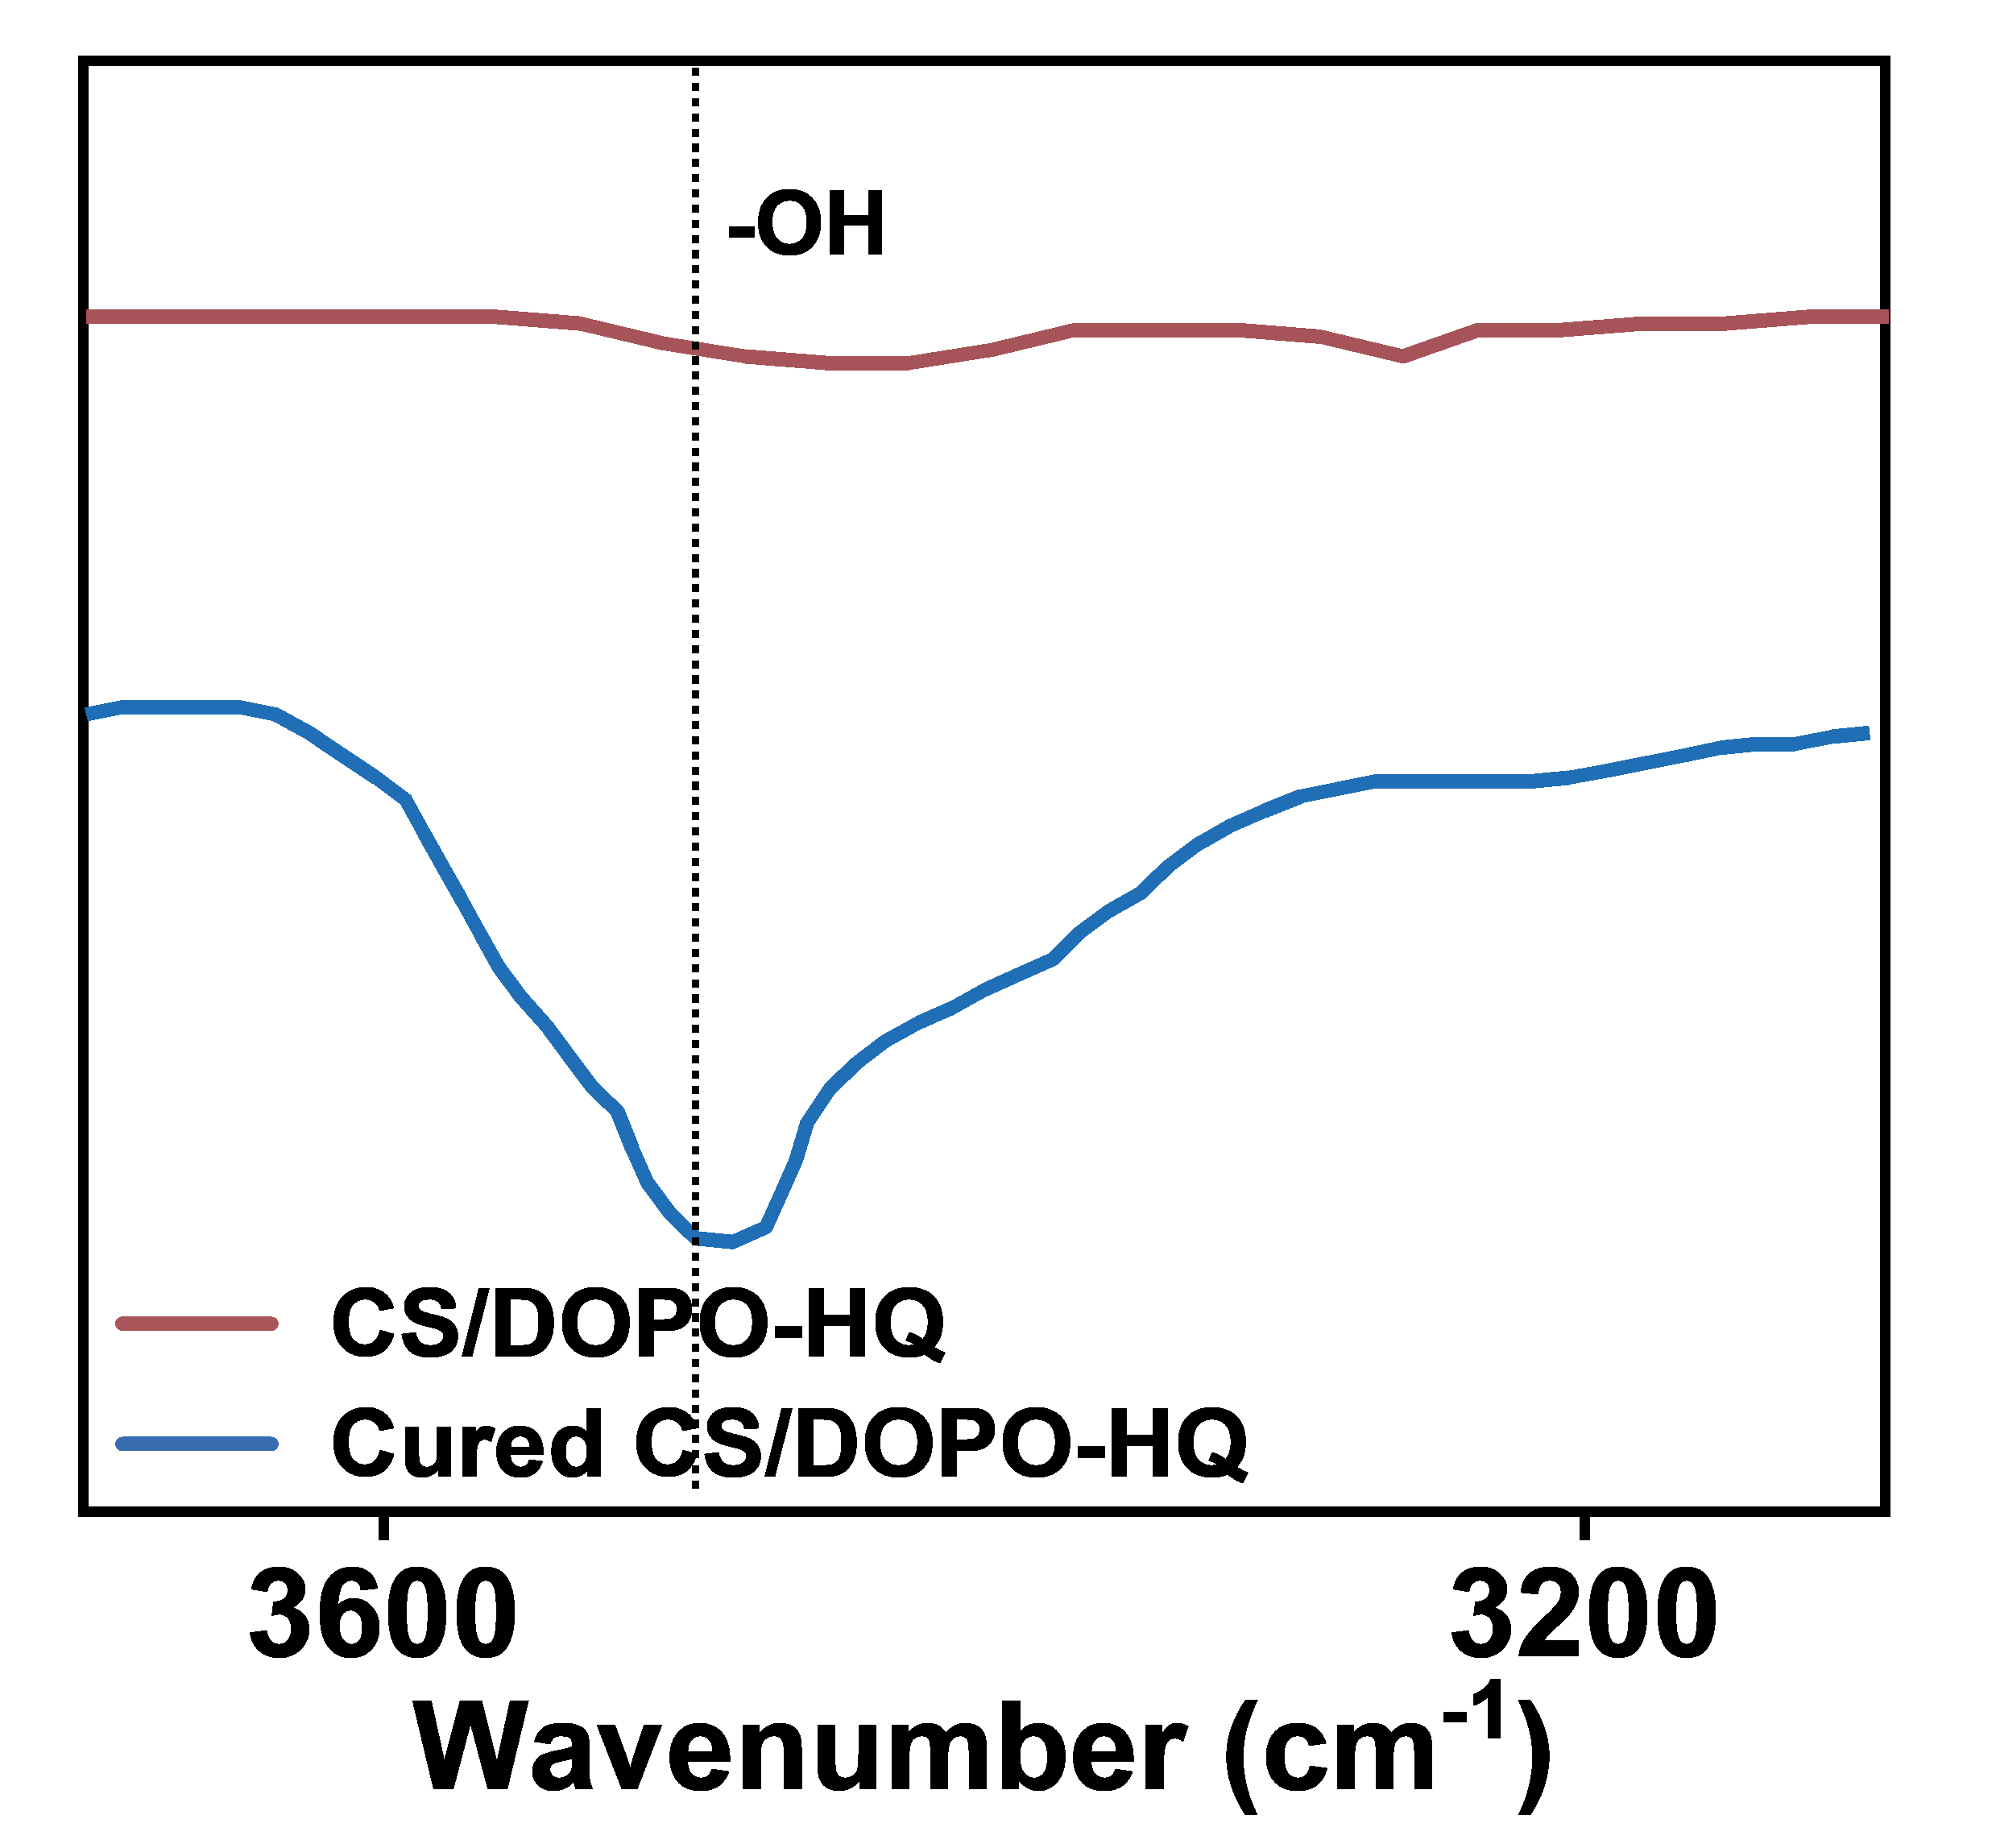


**Figure S9.** Infrared spectra of CS/DOPO-HQ before and after heating.


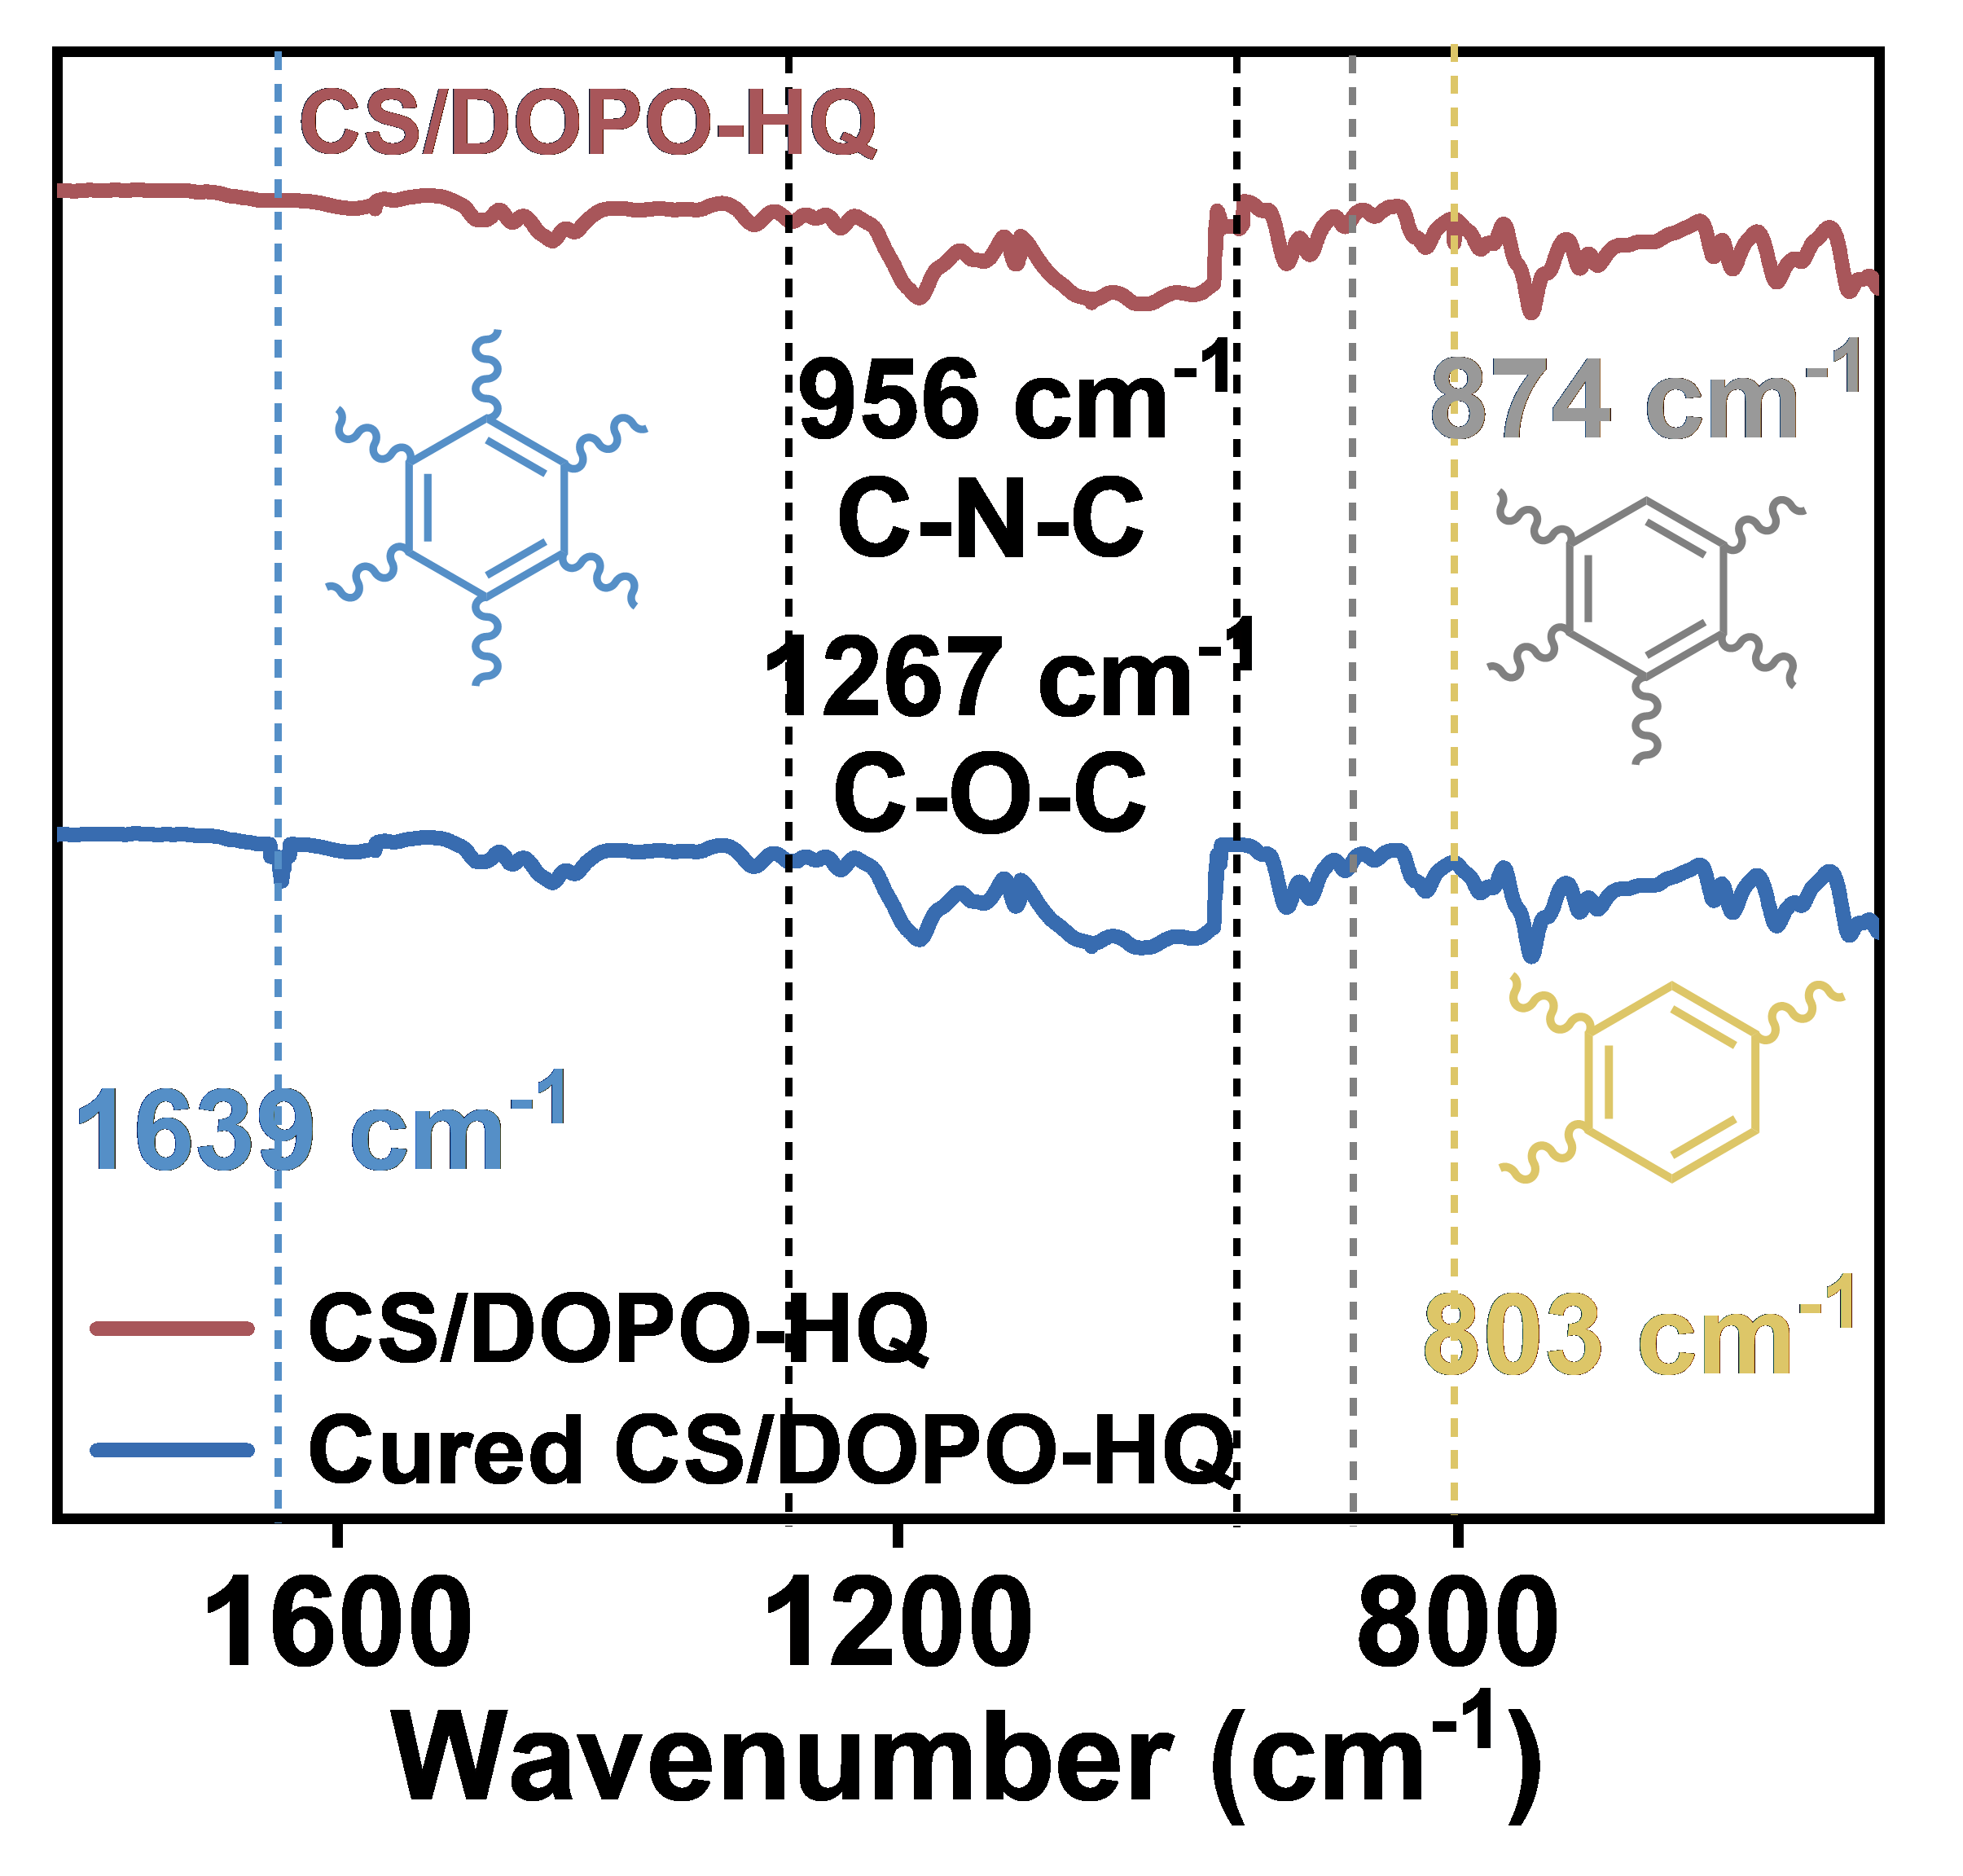


**Figure S10.** Infrared spectra of CS/DOPO-HQ before and after heating.


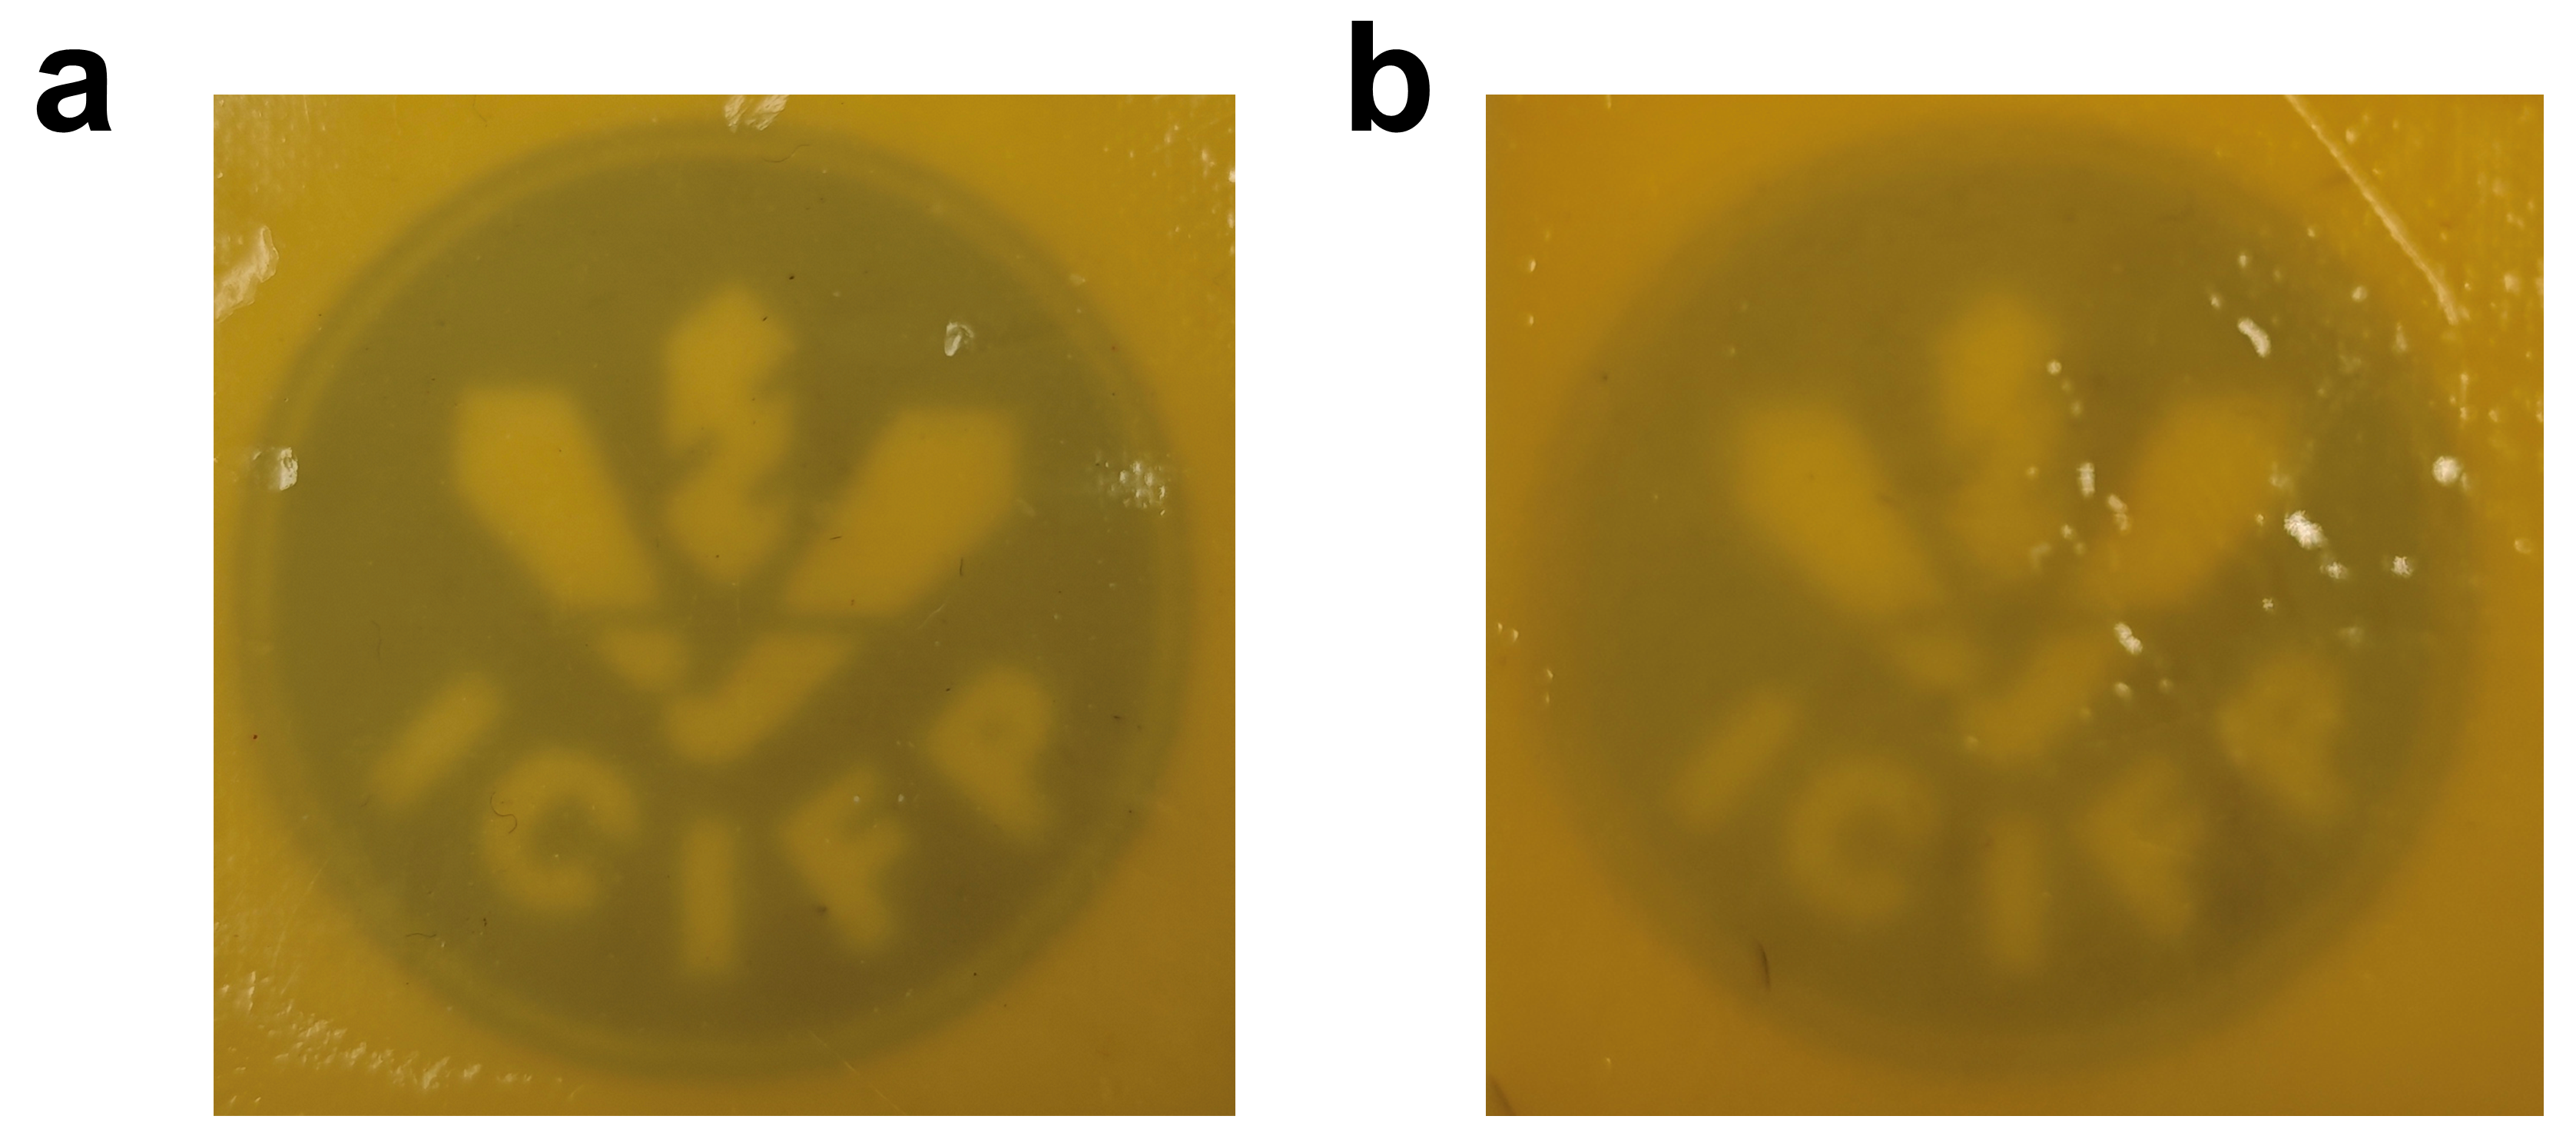


**Figure S11.** Recycled film materials. (a) RSPU, (b) RSPUR.


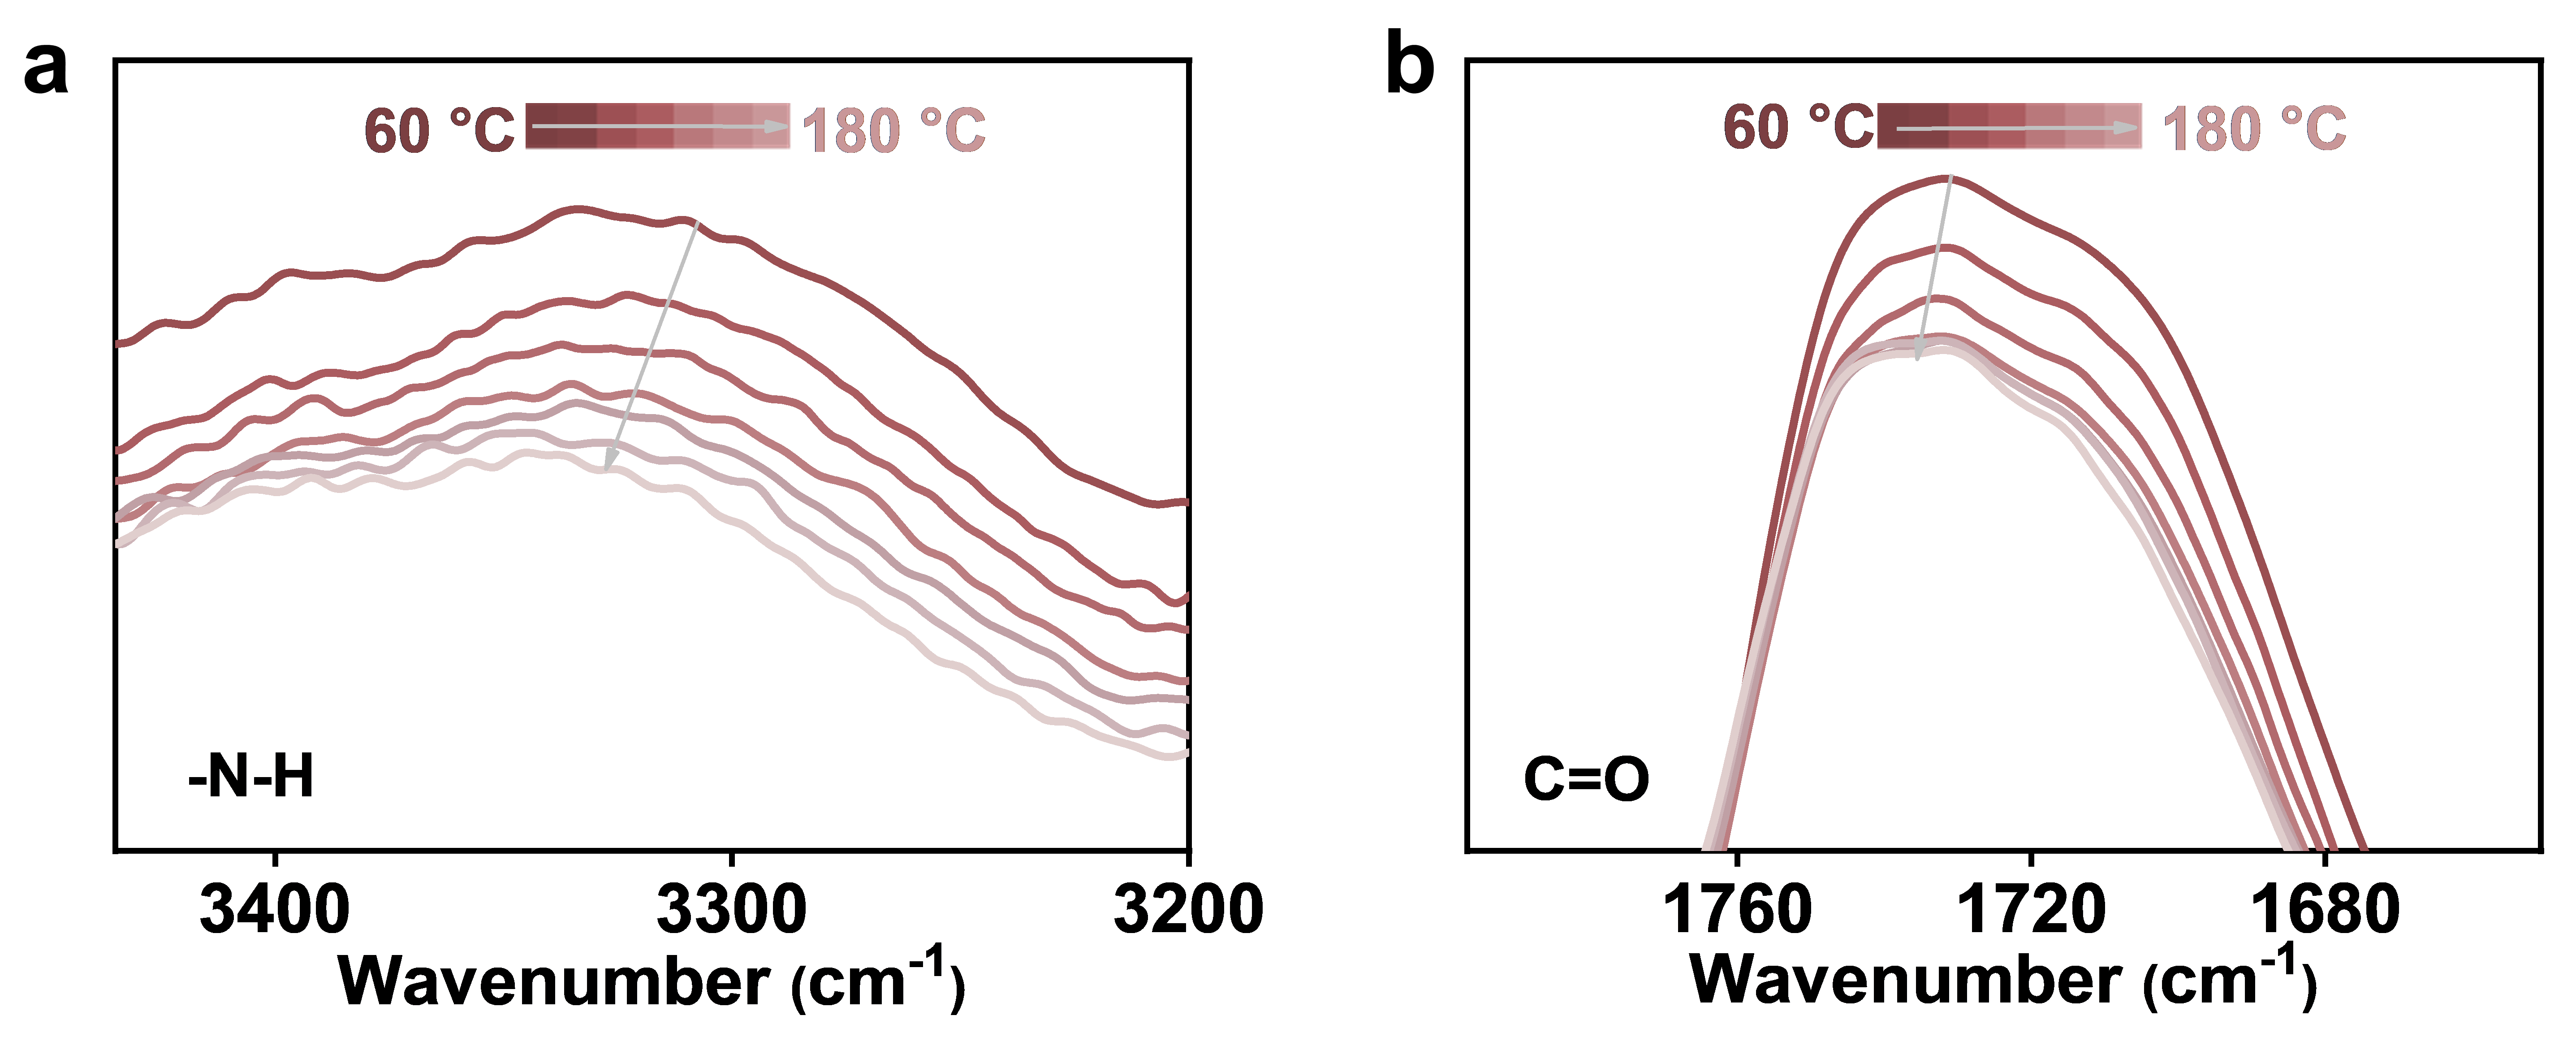


**Figure S12.** Variable-temperature infrared spectra. (a) -N-H, (b) C=O.


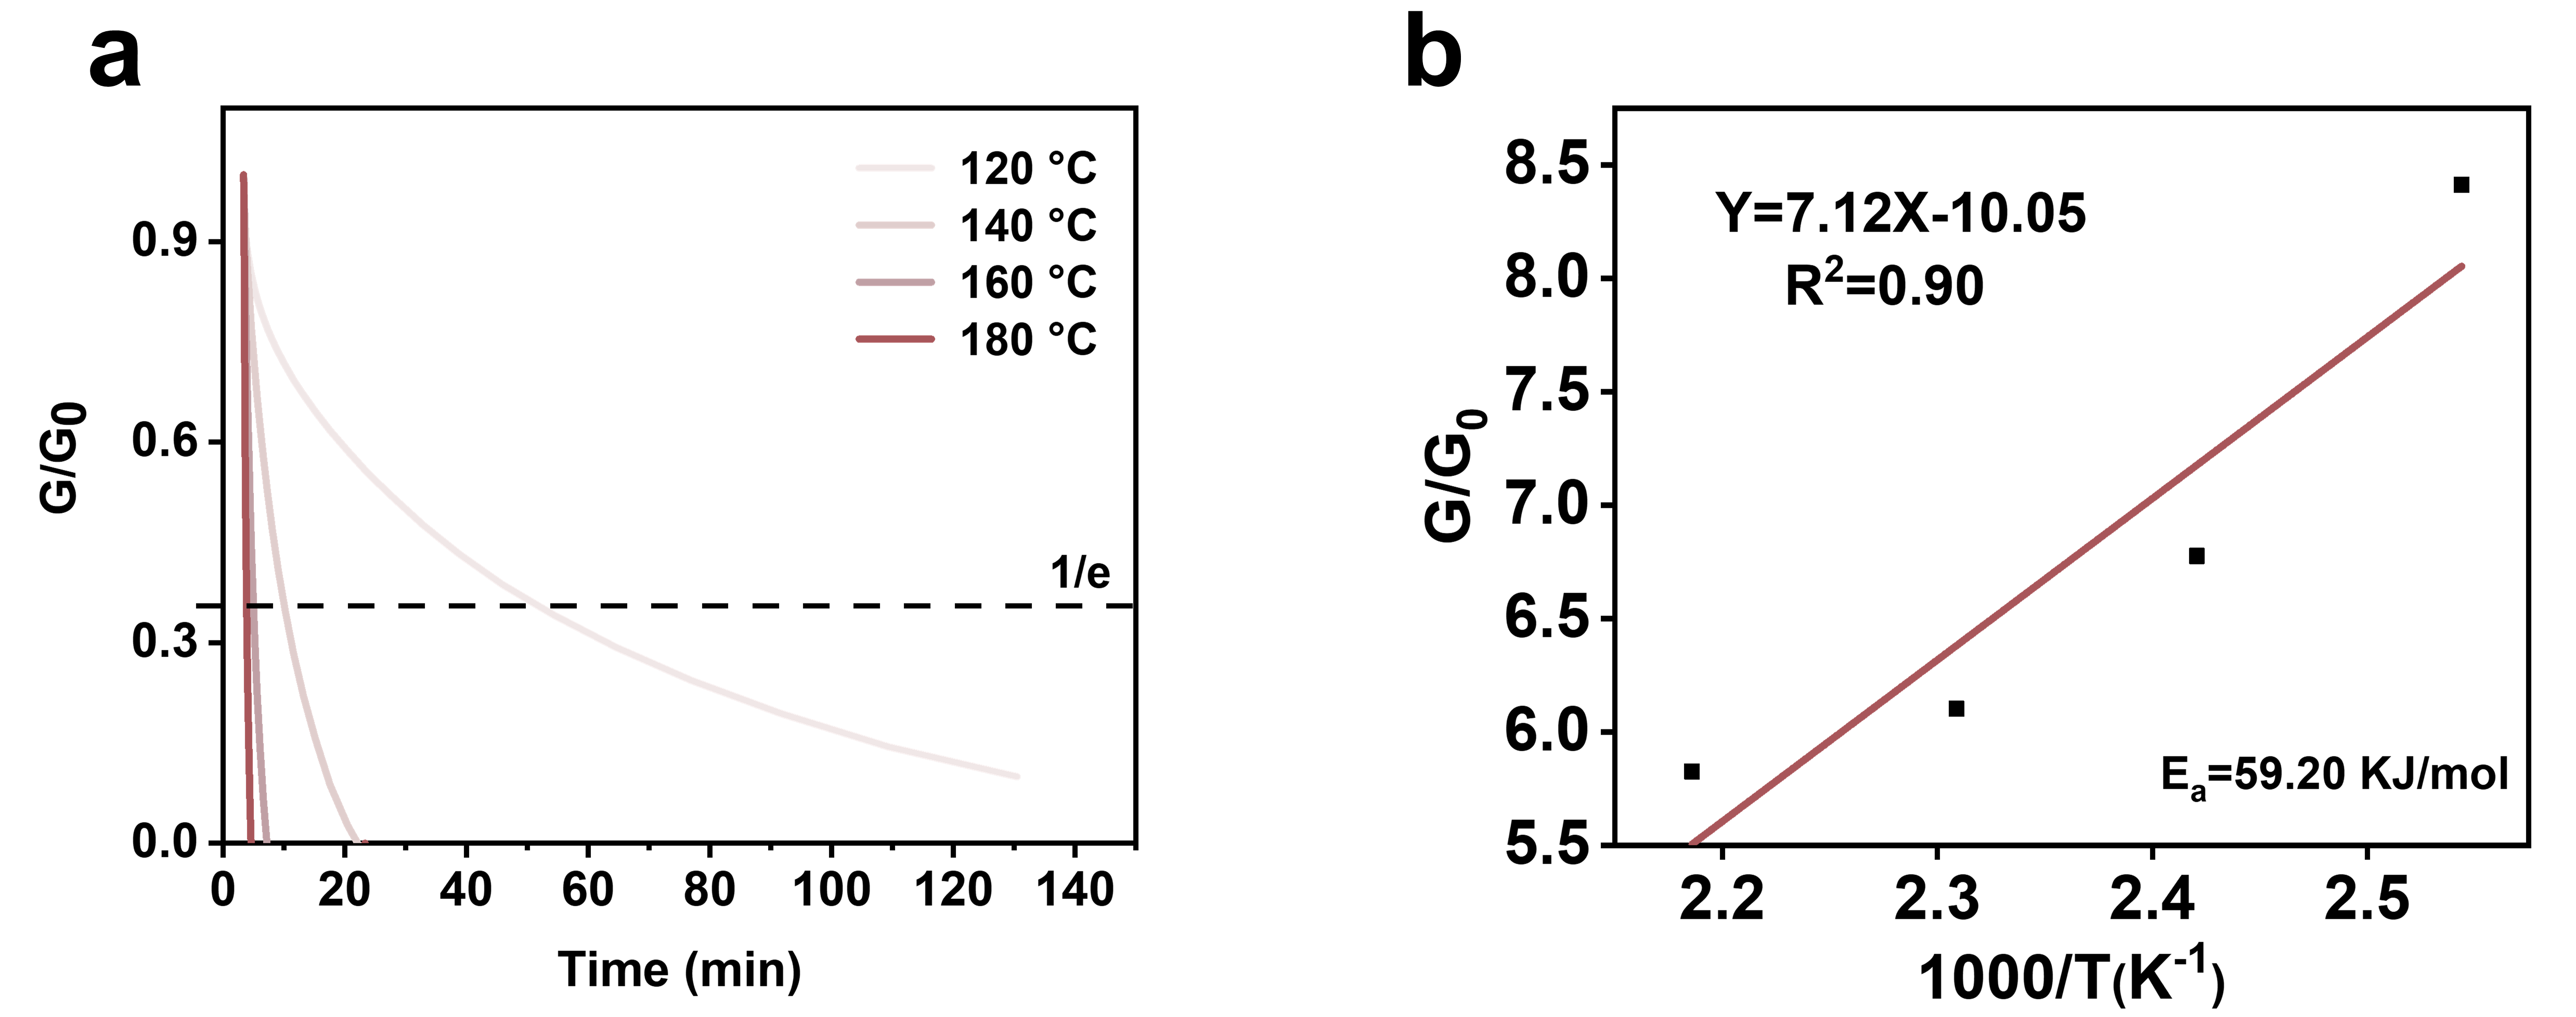


**Figure S13.** (a)Stress relaxation curve of SPUR/CS-D. (b) ln ( τ ) versus 1000/T plot of SPUN/CS-D.


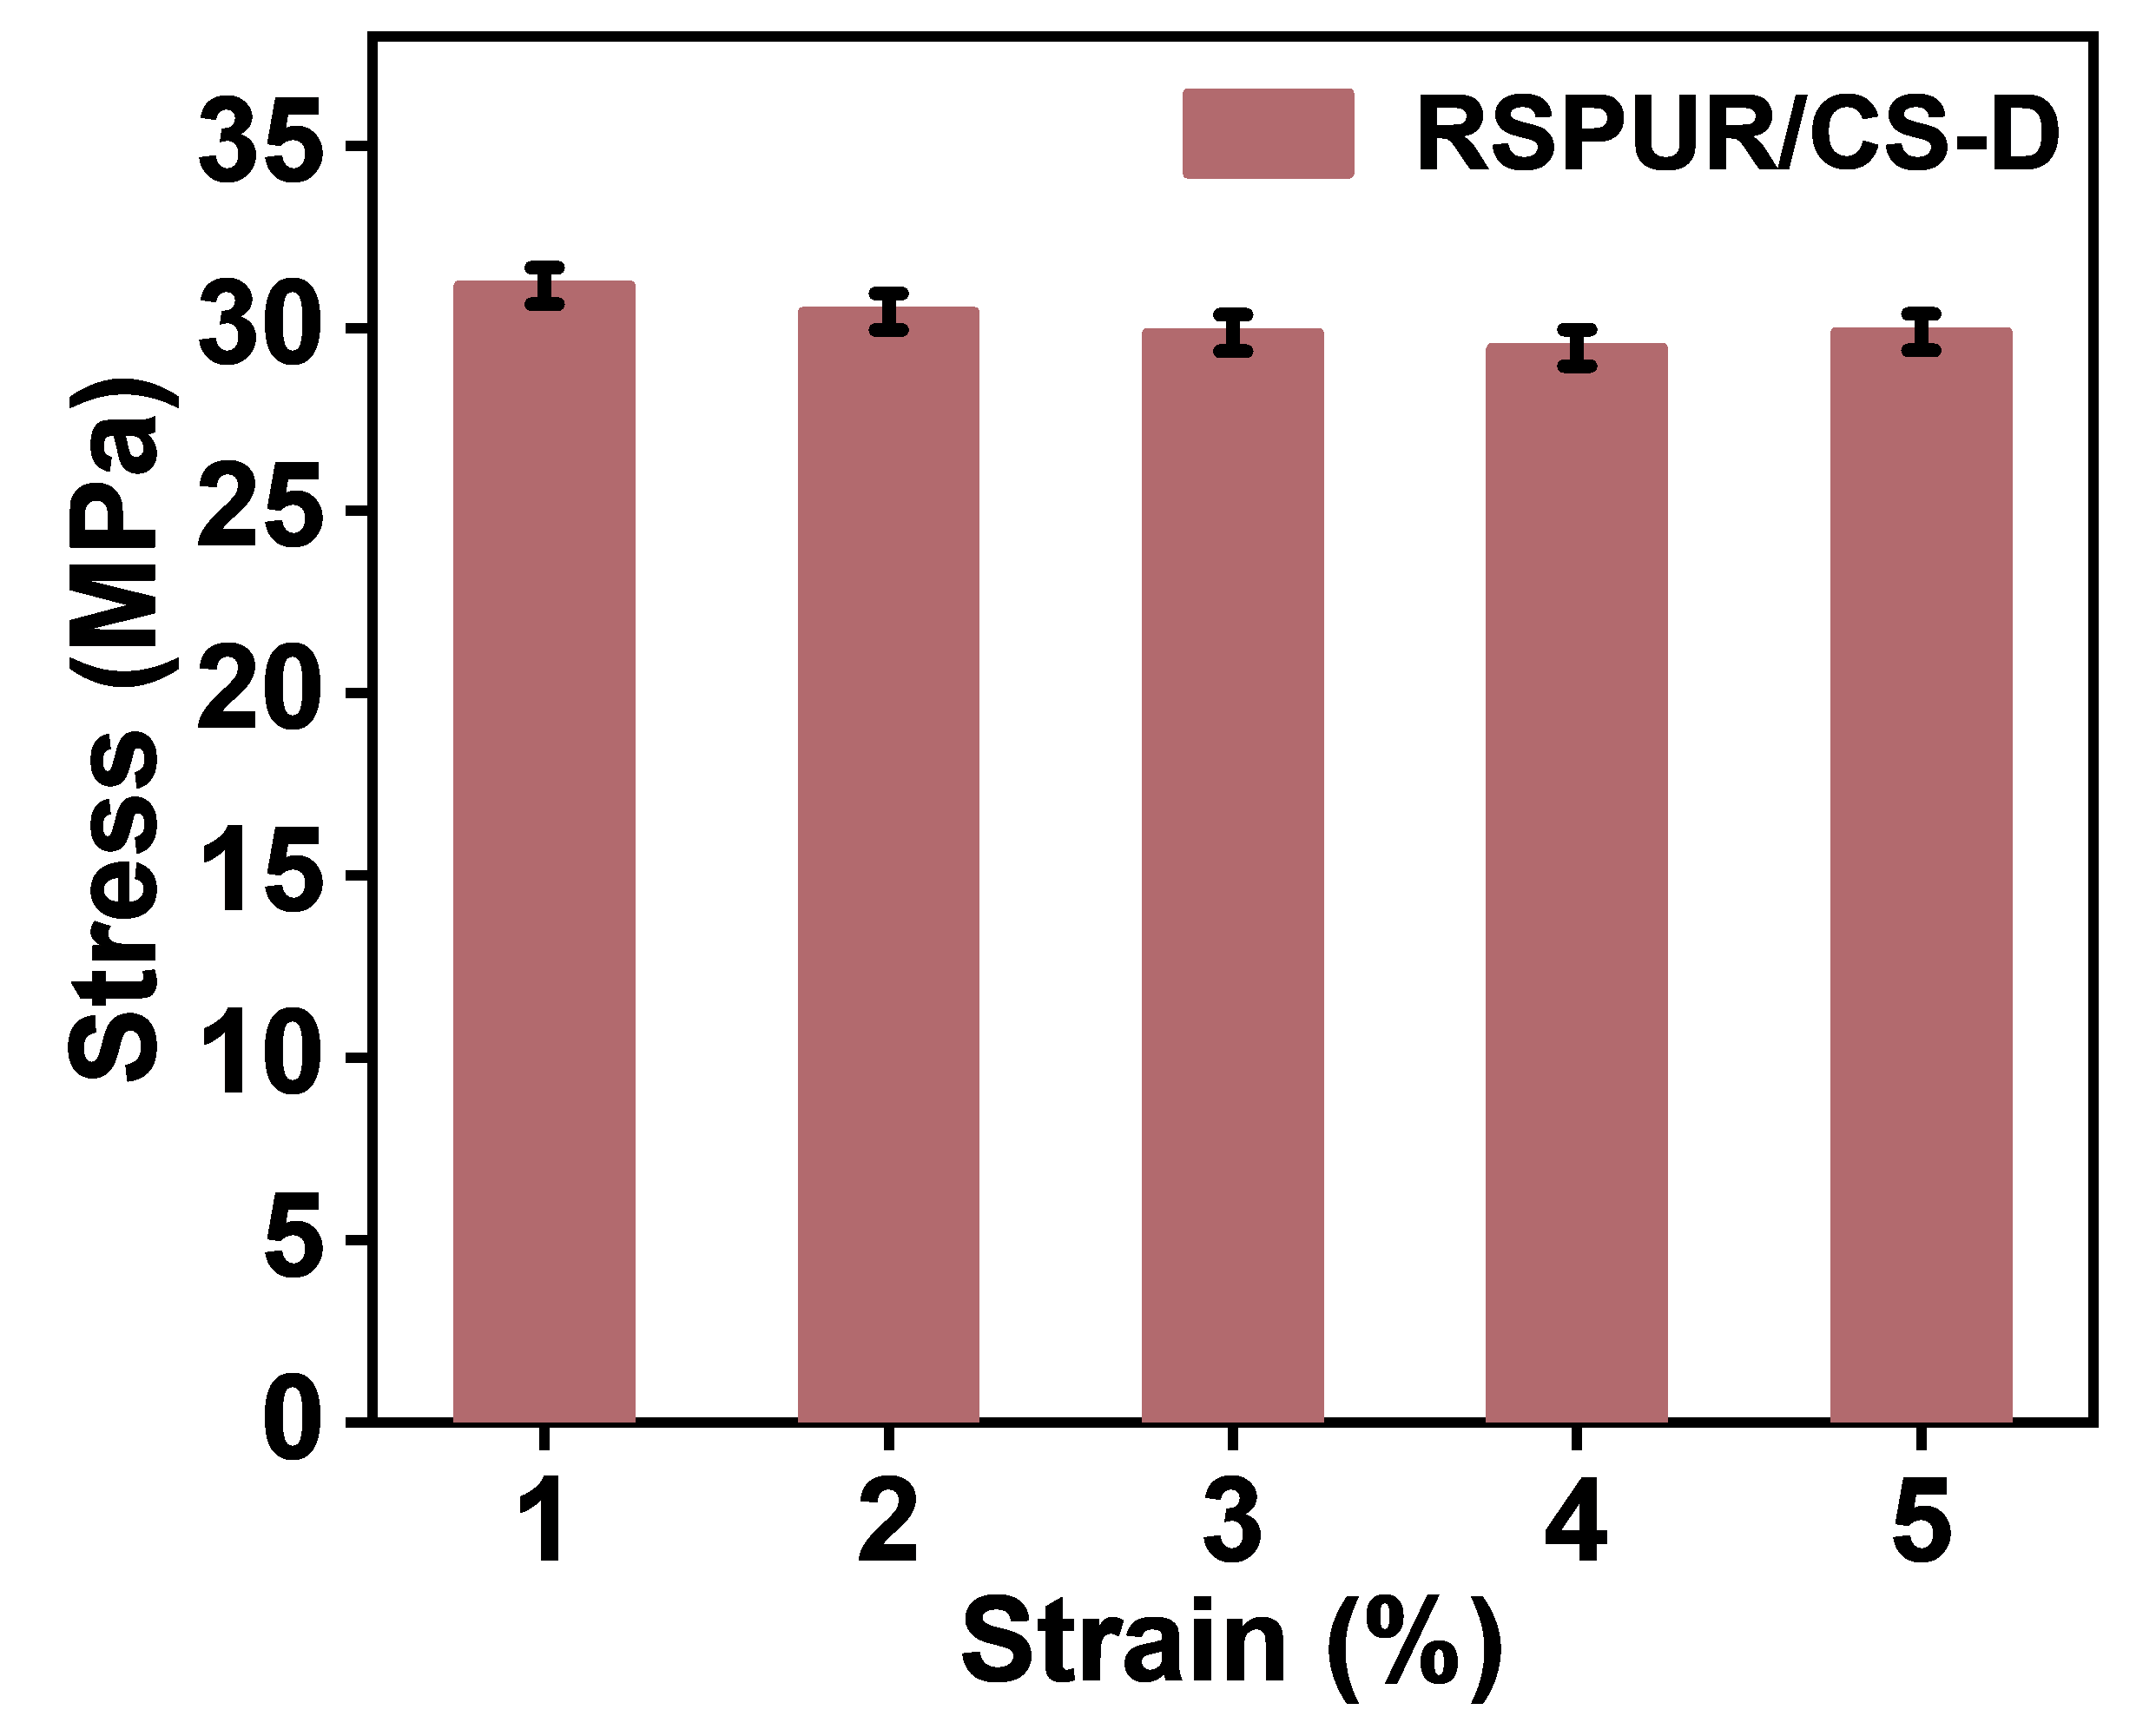


**Figure S14.** Tensile strength of SPUR/CS-D film after repeated recycling.


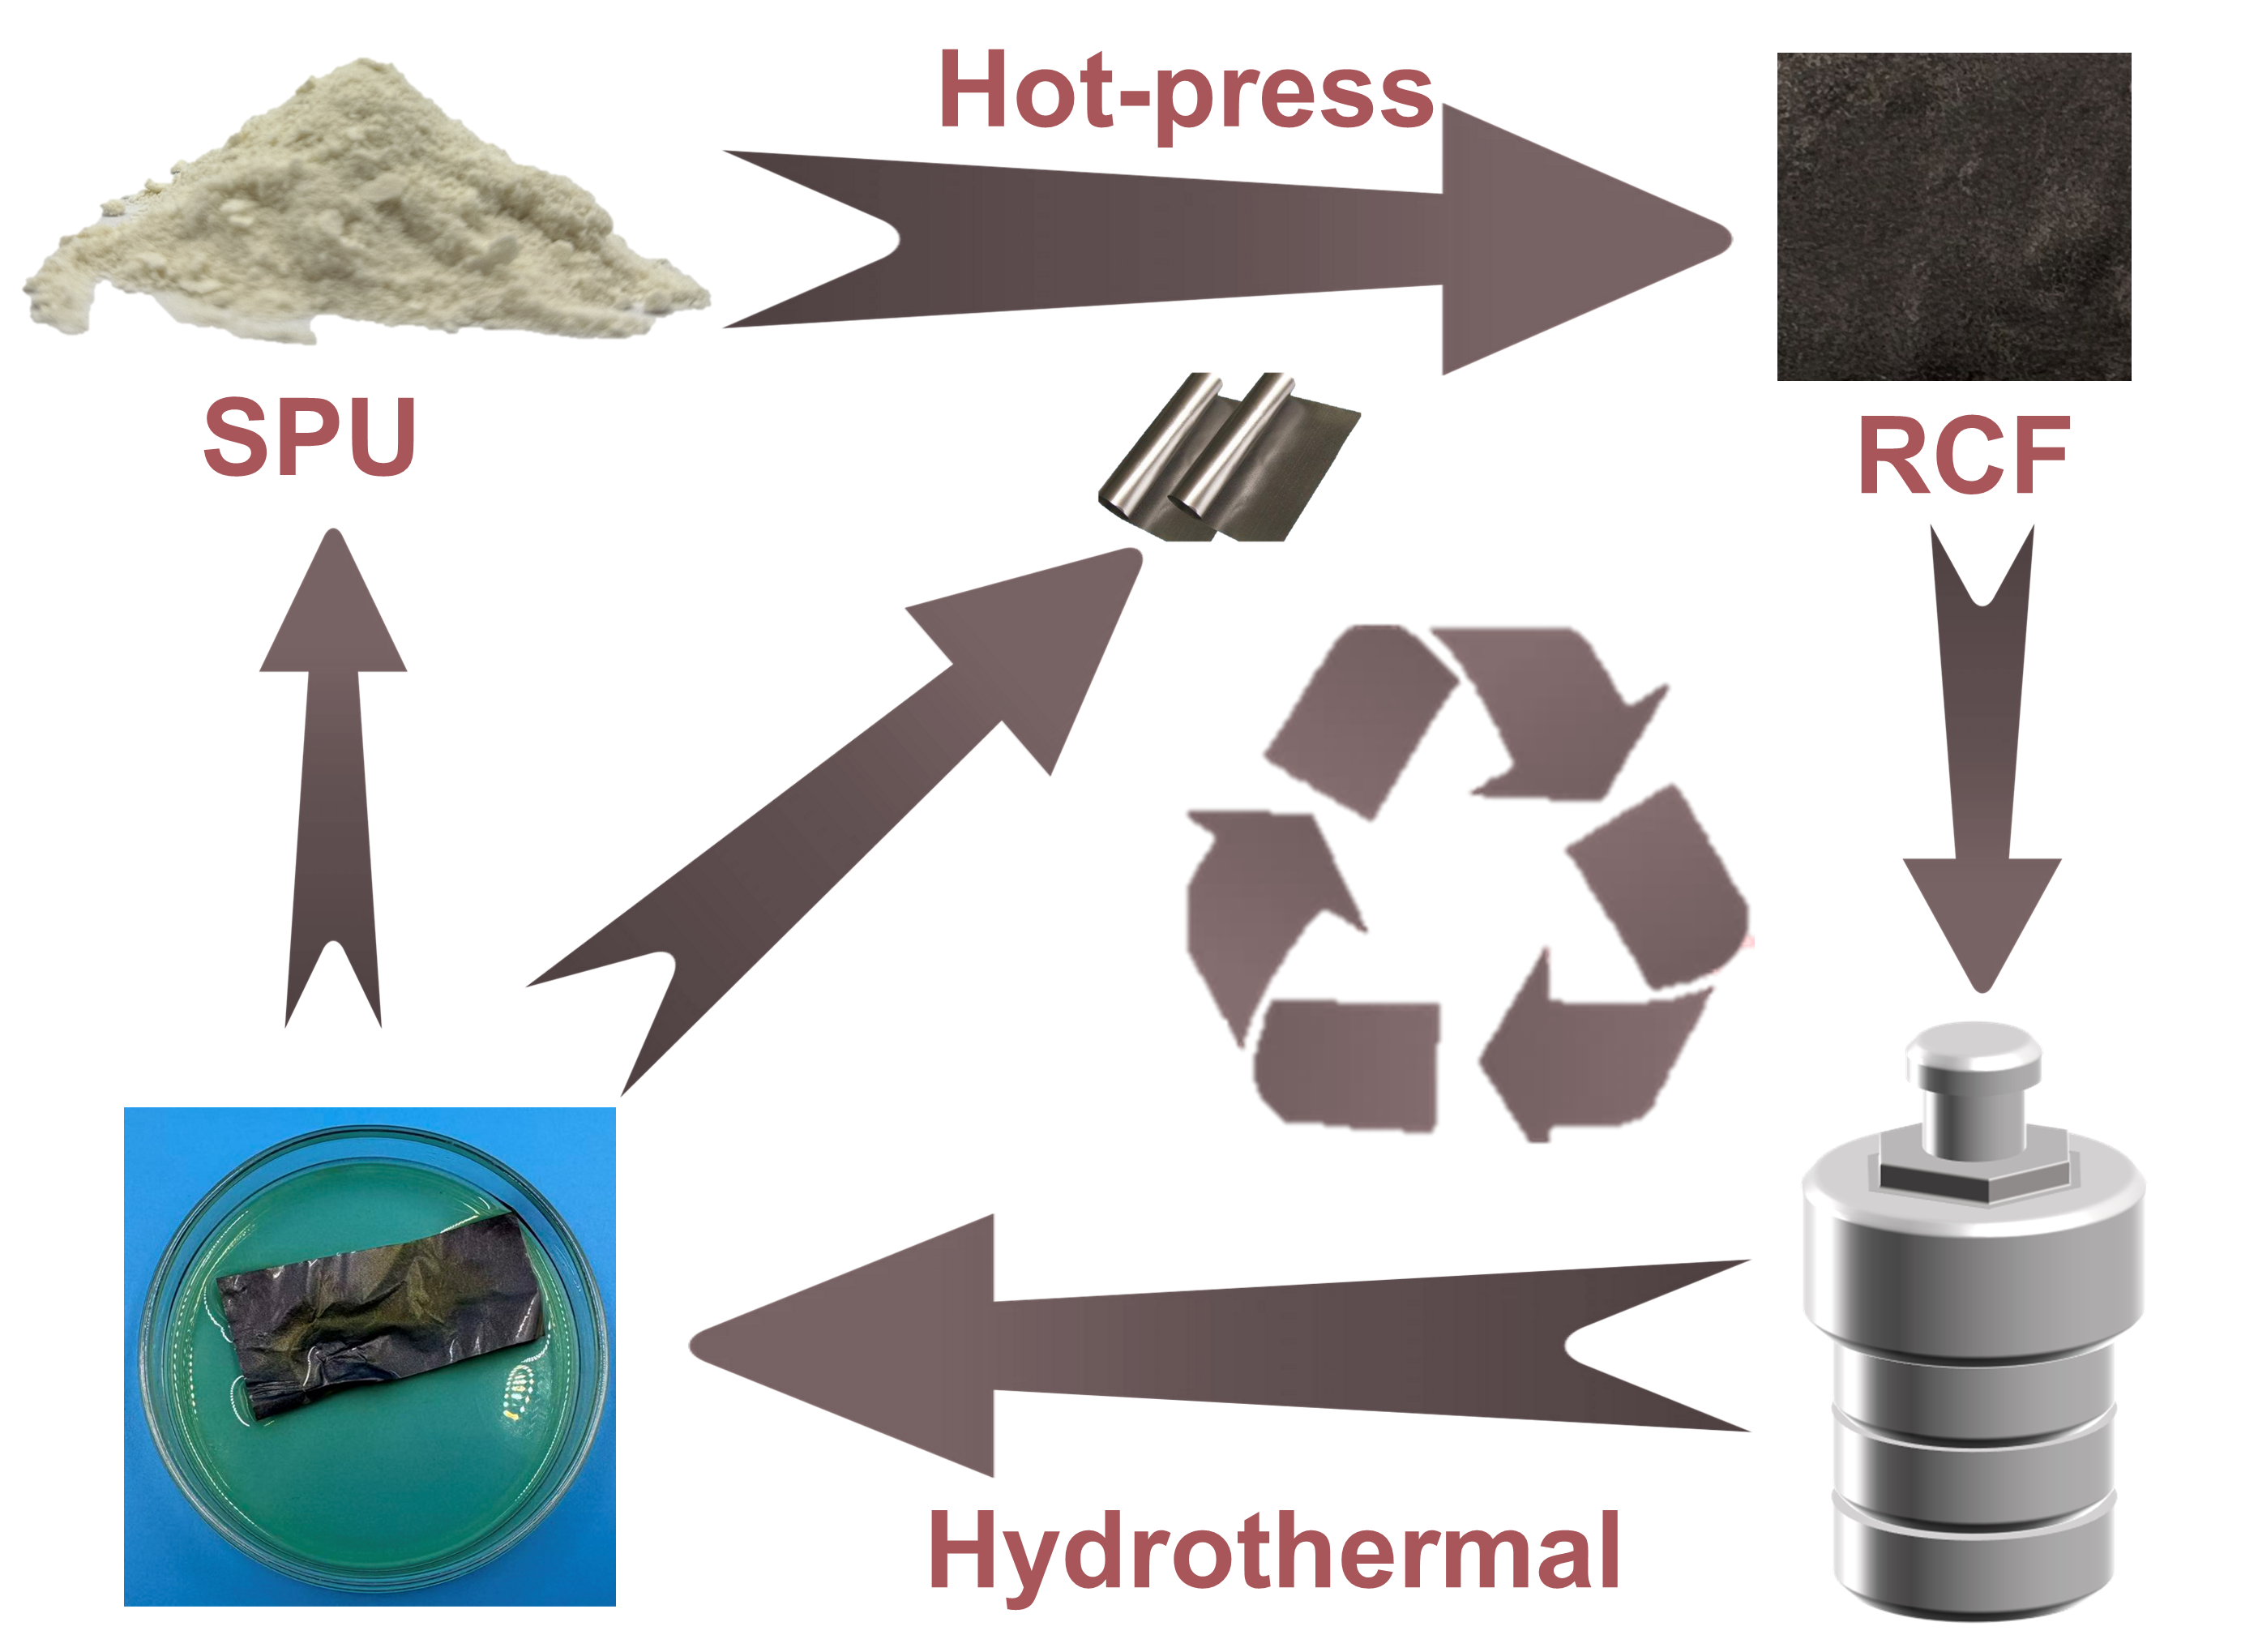


**Figure S15.** Recycling of RCF composite materials.


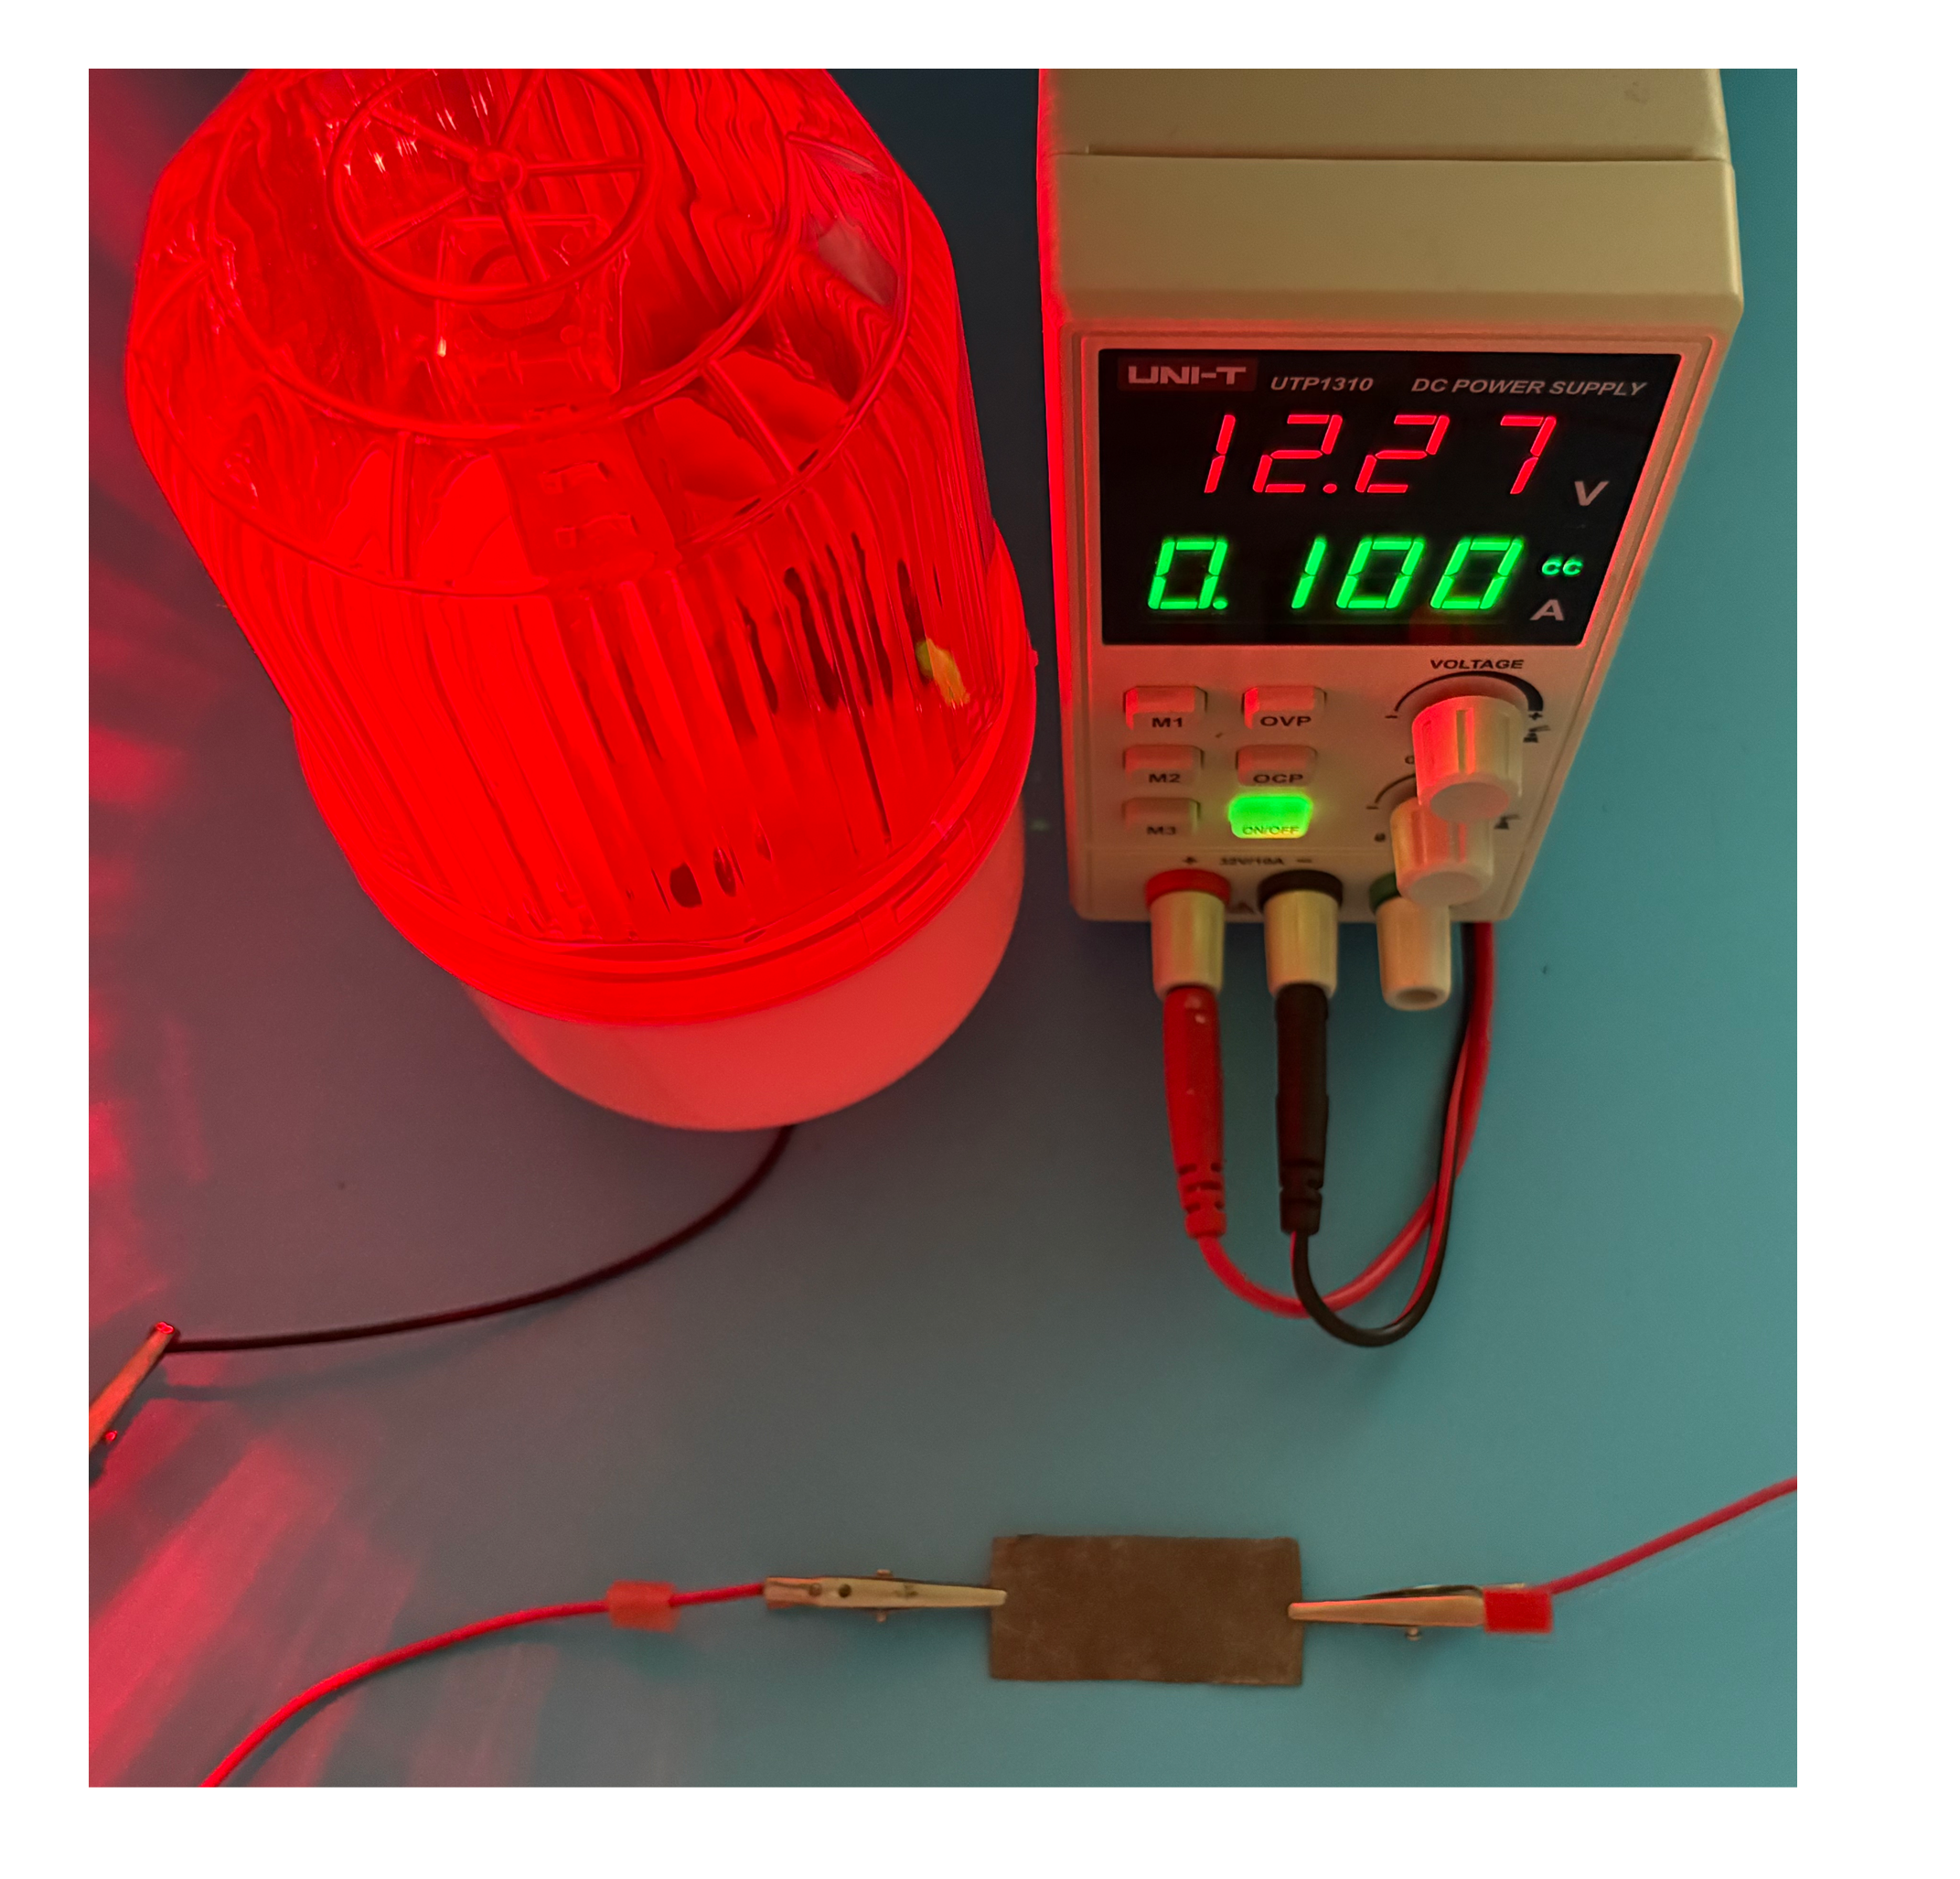


**Figure S16.** Demonstration of the conductivity of RCF.


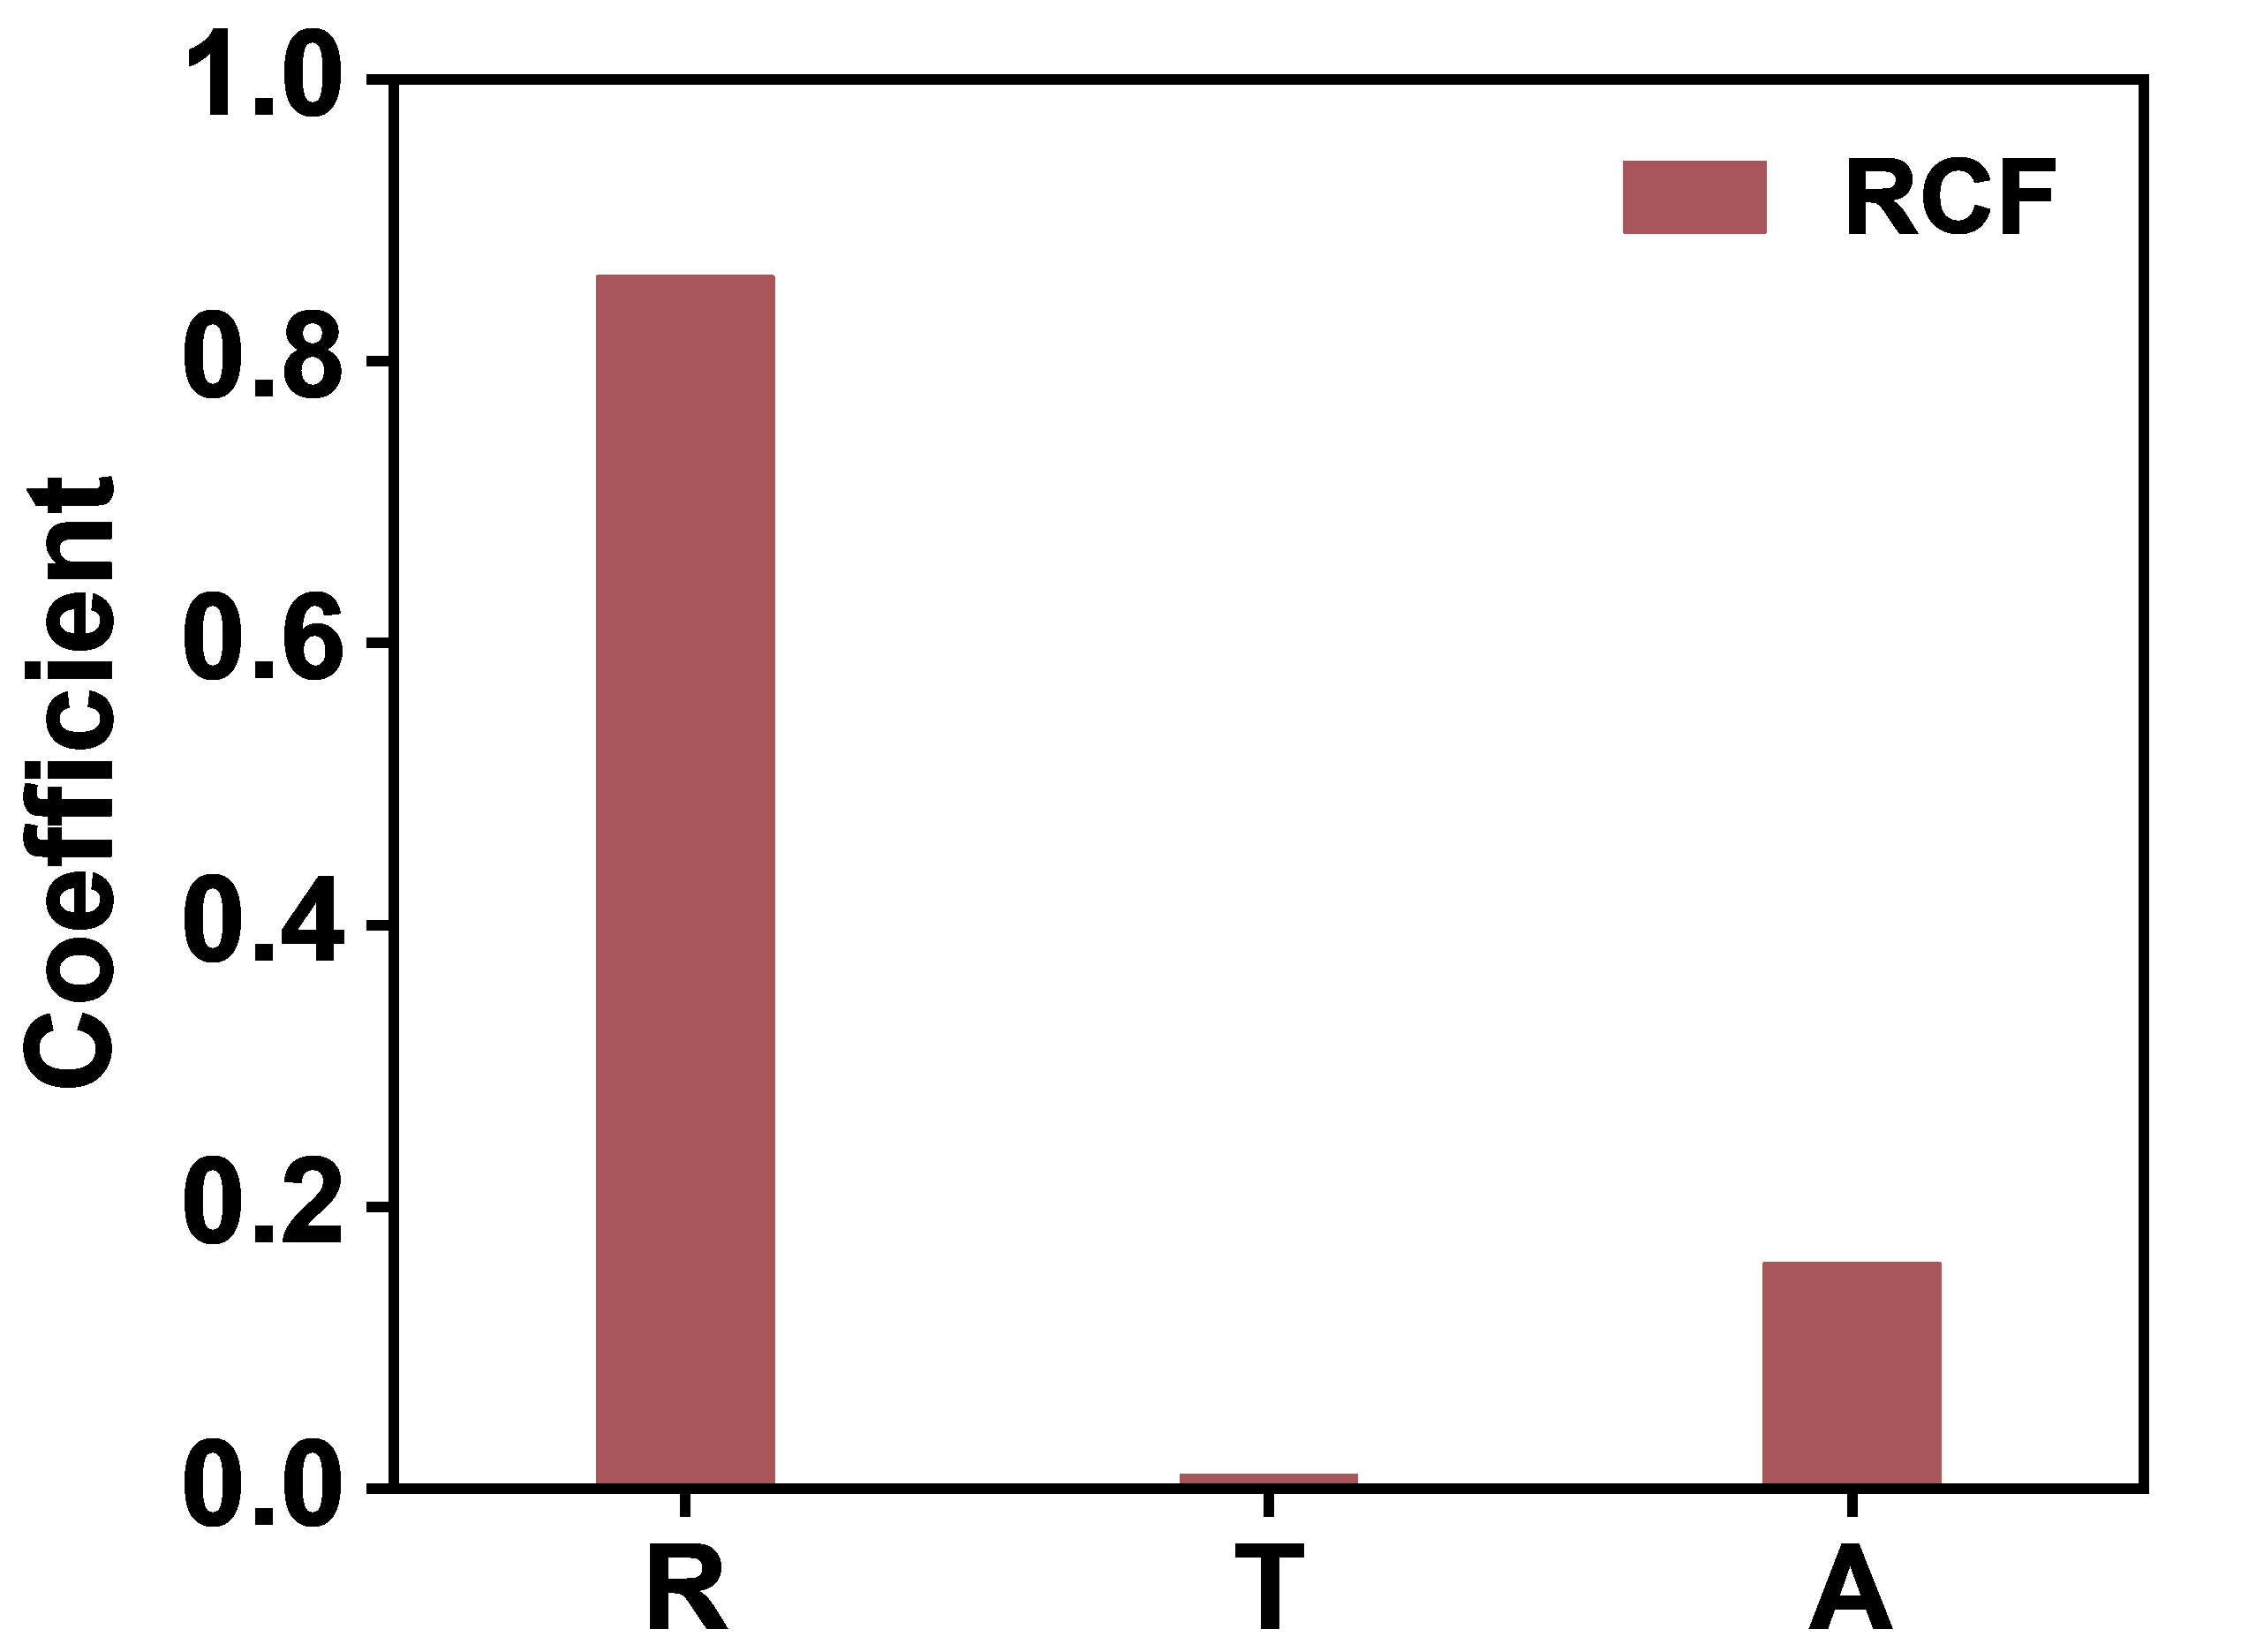


**Figure S17.** The R, A, and T values of the RCF.

**Table S1.** Formulations of SPU foams.

| Samples | COGER/g | CO/g | AK-158/g | N,N-Dimethylcyclohexylamine /g | Water/g | CS/DOPO-HQ | PM-200/g |
| --- | --- | --- | --- | --- | --- | --- | --- |
| SPU | 0 | 100 | 3 | 0.2 | 3 | 0 | 64 |
| SPUR (20%) | 20 | 80 | 3 | 0.2 | 3 | 0 | 60 |
| SPUR (40%) | 40 | 60 | 3 | 0.2 | 3 | 0 | 58 |
| SPUR (60%) | 60 | 40 | 3 | 0.2 | 3 | 0 | 54 |
| SPUR (80%) | 80 | 20 | 3 | 0.2 | 3 | 0 | 50 |
| SPUR/CS-D1 | 60 | 40 | 3 | 0.2 | 3 | 4 | 58 |
| SPUR/CS-D2 | 60 | 40 | 3 | 0.2 | 3 | 8 | 62 |
| SPUR/CS-D3 | 60 | 40 | 3 | 0.2 | 3 | 13 | 64 |
| SPUR/CS-D4 | 60 | 40 | 3 | 0.2 | 3 | 16 | 67 |
| SPU/CS-D | 0 | 100 | 3 | 0.2 | 3 | 13 | 64 |

**Table S2.** Fire-retardant properties of SPU foams.

| Samples | SPU | SPUR | SPUR/CS-D |
| --- | --- | --- | --- |
| LOI (%) | 19.3 | 22.4 | 32.8 |
| TTI (s) | 3 ± 1 | 4 ± 1 | 4 ± 1 |
| PHRR (KW/m2) | 830.12 ± 0.01 | 625.31 ± 0.02 | 102.64 ± 0.01 |
| TPHRR (s) | 286.62 ± 0.05 | 278.43 ± 0.02 | 47.34 ± 0.02 |
| THR (MJ/m2) | 338.13 ± 0.01 | 253.43 ± 0.03 | 102.61 ± 0.01 |
| TSP (m2) | 21.10 ± 0.02 | 18.22 ± 0.04 | 5.21 ± 0.03 |

**Table S3.** Comparison of flame-retardant properties of this work with other foam materials.[9-23]

| Samples | LOI | THR reduction | PHRR reduction | TSP reduction |
| --- | --- | --- | --- | --- |
| 1 | 31.78 | 47.19 | 61.97 | 58.89 |
| 2 | / | 16.37 | 70.63 | / |
| 3 | / | 62.80 | 33.09 | / |
| 4 | 27.48 | 25.61 | 31.09 | 20.45 |
| 5 | 27.21 | 46.37 | 54.36 | 26.32 |
| 6 | 28.61 | 35.08 | 50.69 | 28.71 |
| 7 | 26.48 | 16.37 | 26.88 | 41.57 |
| 8 | / | 50.05 | 39.96 | / |
| 9 | / | 61.15 | 40.96 | / |
| 10 | / | 52.53 | 70.95 | / |
| 11 | 28.04 | 37.13 | 41.63 | 24.95 |
| 12 | / | 54.99 | 65.93 | / |
| 13 | 22.19 | 20.90 | 19.18 | 21.48 |
| 14 | 24.48 | 45.76 | 51.52 | 27.02 |
| 15 | 18.96 | 12.27 | 18.85 | 7.99 |
| 16 | 24.53 | / | / | 10.75 |
| This work | 32.80 | 69.80 | 78.91 | 75.70 |

**Table S4.** Fire-retardant properties of SPU foams.

| Samples | SPU | SPUR | SPUR/CS-D |
| --- | --- | --- | --- |
| *T*5% (°C) | 241.58 | 289.71 | 278.64 |
| *RC* (wt%) | 5.74 | 7.26 | 35.40 |

**Table S5.** Fire-retardant properties of SPU foams.[24-32]

| Samples | EMI SE (dB) | Stress (MPa) | Recyclable | Conductivity  (S/m) |
| --- | --- | --- | --- | --- |
| 1 | 25.2 | / | / | 8.4×104 |
| 2 | 47.7 | / | / | 4.1×104 |
| 3 | 43.0 | / | / | 1.6×104 |
| 4 | 21.4 | 34 | / | 6.5×104 |
| 5 | 53.3 | 29.5 | / | 2.4×104 |
| 6 | 60.0 | 6 | / | 9.7×103 |
| 7 | 63.3 | 2.4 | / | 1.1×104 |
| 8 | 58.0 | / | / | 1.2×104 |
| This work | 72.4 | 29.2 | √ | 5.4×104 |

**References**

1. Zhang T, Pan Z, Tian L, Zhao B, Song F, Zhou Y, Zhang M (2025) High-performance flame-retardant polyurethane foam driven by bio-based benzoxazine functional units: a full-link exploration from material design to chemical recycling. Chemical Engineering Journal 525:170483. <https://doi.org/10.1016/j.cej.2025.170483>

2. Vanin A P, Camassola M, Eiser E, Stokke B T (2025) Characterization of the polysaccharide schizophyllan and schizophyllan–chitosan hydrogel formation by diffusing-wave spectroscopy. Carbohydrate Polymers 352:123168. <https://doi.org/10.1016/j.carbpol.2024.123168>

3. Roas-Escalona N, Becquart F, Delair T, Dutertre F (2024) Chitosan-based hydrogels: Influence of crosslinking strategy on rheological properties. Carbohydrate Polymers 341:122329. <https://doi.org/10.1016/j.carbpol.2024.122329>

4. Zhao B, Song F, Pan Z, Tian L, Zhang T, Zhou Y, Zhang M (2025) Construction of flame-retardant and recyclable tung oil-based polyurethane composite foam: A green way to comprehensive utilization. Chemical Engineering Journal 509:161433. <https://doi.org/10.1016/j.cej.2025.161433>

5. Zhao B, Song F, Pan Z, Xue Y, Tian L, Zhang T, Tan L, Yang R, Zhou Y, Zhang M (2025) Tung oil-derived polyurethane composite foams based on dual dynamic phenol-carbamate exchange with desirable mechanical properties, flame retardancy and recyclability. Composites Part B: Engineering 297:112306. <https://doi.org/10.1016/j.compositesb.2025.112306>

6. Liu J, Xiao Y, Wang Y, Wuliu Y, Zhu X, Zhang L, Liu X (2024) A high-temperature-triggered crosslinking reaction to achieve excellent intrinsic flame retardancy of organic phase change composites. Materials Horizons 11(21):5274-5284. 10.1039/D4MH00831F

7. Cheng S, Chen Z, Sheng D, Dong W, Cao R, Su Z, Wu M, Zhu X, Xie A, Mukherjee S, Li W (2025) Sustainable electromagnetic interference shielding materials from cellulose-grafted n-type polymers. Nature Communications 16(1):8608. 10.1038/s41467-025-63665-y

8. Li Y-K, Liu M-X, Li C-Y, Cui K-P, Li L-B, Jia L-C (2025) Aramid nanofibers-assisted graphite films for efficient electromagnetic interference shielding. Composites Part B: Engineering 296:112269. <https://doi.org/10.1016/j.compositesb.2025.112269>

9. Wang S-X, Zhao H-B, Rao W-H, Huang S-C, Wang T, Liao W, Wang Y-Z (2018) Inherently flame-retardant rigid polyurethane foams with excellent thermal insulation and mechanical properties. Polymer 153:616-625. <https://doi.org/10.1016/j.polymer.2018.08.068>

10. Jia D, Hu J, He J, Yang R (2019) Properties of a novel inherently flame-retardant rigid polyurethane foam composite bearing imide and oxazolidinone. Journal of Applied Polymer Science 136(37):47943. <https://doi.org/10.1002/app.47943>

11. Brannum D J, Price E J, Villamil D, Kozawa S, Brannum M, Berry C, Semco R, Wnek G E (2019) Flame-Retardant Polyurethane Foams: One-Pot, Bioinspired Silica Nanoparticle Coating. ACS Applied Polymer Materials 1(8):2015-2022. 10.1021/acsapm.9b00283

12. Gao M, Li J, Zhou X (2019) A flame retardant rigid polyurethane foam system including functionalized graphene oxide. Polymer Composites 40(S2):E1274-E1282. <https://doi.org/10.1002/pc.24965>

13. Cao C-F, Yu B, Guo B-F, Hu W-J, Sun F-N, Zhang Z-H, Li S-N, Wu W, Tang L-C, Song P, Wang H (2022) Bio-inspired, sustainable and mechanically robust graphene oxide-based hybrid networks for efficient fire protection and warning. Chemical Engineering Journal 439:134516. <https://doi.org/10.1016/j.cej.2022.134516>

14. Xu W, Wang G, Zheng X (2015) Research on highly flame-retardant rigid PU foams by combination of nanostructured additives and phosphorus flame retardants. Polymer Degradation and Stability 111:142-150. <https://doi.org/10.1016/j.polymdegradstab.2014.11.008>

15. Han S, Zhu X, Chen F, Chen S, Liu H (2020) Flame-retardant system for rigid polyurethane foams based on diethyl bis(2-hydroxyethyl)aminomethylphosphonate and in-situ exfoliated clay. Polymer Degradation and Stability 177:109178. <https://doi.org/10.1016/j.polymdegradstab.2020.109178>

16. He L, Chen M-J, Zeng F-R, Wang T, Wei L, Fang D-X, Guo S-Q, Deng C, Zhao H-B, Wang Y-Z (2024) Multiple free-radical-trapping and hydrogen-bonding-enhanced polyurethane foams with long-lasting flame retardancy, aging resistance, and toughness. Materials Horizons 11(18):4462-4471. 10.1039/D4MH00607K

17. Fu Z-C, Bu F-Y, Li Z-P, Wang T, Deng J-N, Zhao H-B, Huang S-C, Wang Y-Z, Chen M-J (2024) Enhancing flame retardancy, mechanical durability, and anti-aging property of polyurethane foam via novel cyclic phosphonate. Chemical Engineering Journal 479:147935. <https://doi.org/10.1016/j.cej.2023.147935>

18. Lee S H, Lee S G, Lee J S, Ma B C. Understanding the Flame Retardant Mechanism of Intumescent Flame Retardant on Improving the Fire Safety of Rigid Polyurethane Foam. Polymers2022. p. 4904.

19. Lubczak R, Broda D, Kus-Liśkiewicz M, Szczęch D, Bobko E, Dębska B, Szpiłyk M, Lubczak J (2021) Flame retardant polyurethane foams with starch unit. Polymer Testing 104:107395. <https://doi.org/10.1016/j.polymertesting.2021.107395>

20. Nizam M, Çakır Çanak T, Serhatlı İ E (2025) Fabrication of Fluorine and Nitrogen-Based Flame Retardants Containing Rigid Polyurethane Foam with Improved Hydrophobicity and Flame Retardancy. ACS Omega 10(17):17847-17858. 10.1021/acsomega.5c00603

21. Cao F, Zhang X, Yang H, Huang M, Xu W, Liu H, Liu W (2025) A low loading synergistic flame retardant rigid polyurethane foam with high mechanical retention after combustion. Polymer 339:129170. <https://doi.org/10.1016/j.polymer.2025.129170>

22. Chen F, Wang C, Liu X, Wang Z, Fang L, Zhang Y (2023) Flame-retardant properties of chitin liquefaction-based polyurethane foam. Journal of Polymer Research 30(4):143. 10.1007/s10965-023-03521-z

23. Wang X, Shi Y, Liu Y, Wang Q (2019) Recycling of waste melamine formaldehyde foam as flame-retardant filler for polyurethane foam. Journal of Polymer Research 26(3):57. 10.1007/s10965-019-1717-5

24. Hu D, Huang X, Li S, Jiang P (2020) Flexible and durable cellulose/MXene nanocomposite paper for efficient electromagnetic interference shielding. Composites Science and Technology 188:107995. <https://doi.org/10.1016/j.compscitech.2020.107995>

25. Zhou M, Wang J, Tan S, Ji G (2023) Top-down construction strategy toward sustainable cellulose composite paper with tunable electromagnetic interference shielding. Materials Today Physics 31:100962. <https://doi.org/10.1016/j.mtphys.2022.100962>

26. Chen C, Feng W, Wu W, Yu Y, Qian G, Fu L, Min D (2023) A highly strong PEDOT modified wood towards efficient electromagnetic interference shielding. Industrial Crops and Products 202:117109. <https://doi.org/10.1016/j.indcrop.2023.117109>

27. Jiang X, Hu Z, Xu S, Song Y, Zheng Q (2024) PEDOT:PSS/XNBR films for low-temperature stretchable electromagnetic interference shielding. Composites Communications 50:102029. <https://doi.org/10.1016/j.coco.2024.102029>

28. Jiang X, Zhou J, Zhong X, Hu Z, Hu R, Song Y, Zheng Q (2023) Stretchable PEDOT:PSS/Li-TFSI/XSB Composite Films for Electromagnetic Interference Shielding. ACS Applied Materials & Interfaces 15(6):8521-8529. 10.1021/acsami.2c21604

29. Li J, Chu W, Gao Q, Zhang H, He X, Wang B (2022) In Situ Fabrication of Magnetic and Hierarchically Porous Carbon Films for Efficient Electromagnetic Wave Shielding and Absorption. ACS Applied Materials & Interfaces 14(29):33675-33685. 10.1021/acsami.2c05286

30. Ma X, Pan J, Guo H, Wang J, Zhang C, Han J, Lou Z, Ma C, Jiang S, Zhang K (2023) Ultrathin Wood-Derived Conductive Carbon Composite Film for Electromagnetic Shielding and Electric Heating Management. Advanced Functional Materials 33(16):2213431. <https://doi.org/10.1002/adfm.202213431>

31. Zhu W, Chen Z, Liang J, Su D (2022) A laminated carbon nanotubes/silicon boron carbonitride film for high-efficiency electromagnetic interference shielding with oxidation resistance. Carbon 197:65-75. <https://doi.org/10.1016/j.carbon.2022.06.018>

32. Yao Y, Jin S, Wang M, Gao F, Xu B, Lv X, Shu Q (2022) MXene hybrid polyvinyl alcohol flexible composite films for electromagnetic interference shielding. Applied Surface Science 578:152007. <https://doi.org/10.1016/j.apsusc.2021.152007>
